# Supplementary material for: A multi omics approach unravels metagenomic and metabolic alterations of a probiotic in rainbow trout (Oncorhynchus mykiss)
Source: Research Square preprint supplement (doi:10.21203/rs.3.rs-459562/v1), 2021-05-05
Supplement: Supplementary file 1 [file 7d2f5a5121a4a98503319b24.xlsx]

## Sheet: Suppl_Table_S3_3
ID	metabolite	pval	adj_pval	fold_change	Subsystem
1	2-hydroxycaproic acid	0.0021274	0.0268725	-0.45874	Alcohol Metabolism
2	adipic acid	0.0590466	0.248617	0.307591	Alcohol Metabolism
3	spermine	0.716286	0.863862	0.450041	Amine and Polyamine Metabolism
4	leu-gly-leu	0.0377752	0.211155	-0.142664	Amino Acid Metabolism
5	5'-s-methyl-5'-thioadenosine	0.0378319	0.211155	-0.213125	Amino Acid Metabolism
6	val-phe-lys	0.292584	0.575574	0.567369	Amino Acid Metabolism
7	lys-ile	0.436651	0.717782	0.531692	Amino Acid Metabolism
8	lys-val	0.319508	0.599077	1.06052	Amino Acid Metabolism
9	ile-leu-lys	0.896316	0.954515	-0.0396394	Amino Acid Metabolism
10	leu-pro	0.295224	0.576048	0.57965	Amino Acid Metabolism
11	val-leu-lys	0.748302	0.889072	0.136171	Amino Acid Metabolism
12	n-acetyl-l-glutamine	0.69458	0.850506	0.175083	Amino Acid Metabolism
13	lys-pro	0.447567	0.718471	1.17665	Amino Acid Metabolism
14	n-acetylglycine	0.139189	0.37667	0.290036	Amino Acid Metabolism
15	indole-3-carboxylic acid	1.51807e-12	1.21446e-10	-2.09437	Amino Acid Metabolism
16	l-phenylalanine	0.0168833	0.119176	-0.596007	Amino Acid Metabolism
17	ile-ile-lys	0.299963	0.578356	-0.588781	Amino Acid Metabolism
18	ile-pro-lys	0.650022	0.826734	0.505689	Amino Acid Metabolism
19	ile-lys	0.0456595	0.234879	1.40445	Amino Acid Metabolism
20	n-acetyl-dl-glutamic acid	0.251712	0.516333	0.133777	Amino Acid Metabolism
21	ile-glu-lys	0.725362	0.870434	0.480309	Amino Acid Metabolism
22	2-isopropylmalic acid	0.026745	0.172279	0.322539	Amino Acid Metabolism
23	n-formylmethionine	0.710335	0.863862	0.221686	Amino Acid Metabolism
24	n-acetylaspartic acid	0.0408902	0.223037	0.444028	Amino Acid Metabolism
25	n-acetyl-l-phenylalanine	0.215556	0.476787	-0.338857	Amino Acid Metabolism
26	indole-3-lactic acid	0.0545494	0.245533	-0.501404	Amino Acid Metabolism
27	n-acetyl-dl-tryptophan	0.389701	0.677741	0.396127	Amino Acid Metabolism
28	l-cysteinesulfinic acid	0.36241	0.653049	0.186403	Amino Acid Metabolism
29	n-acetyl-l-tyrosine	0.52219	0.778419	-0.179513	Amino Acid Metabolism
30	3-[(methoxycarbonyl)amino]-2,2,3-trimethylbutanoic acid	0.099618	0.323086	-0.585701	Amino Acid Metabolism
31	n-acetyl-l-methionine	0.428121	0.713535	-0.0375082	Amino Acid Metabolism
32	2-(acetylamino)-3-(1h-indol-3-yl)propanoic acid	0.619644	0.821627	-0.272305	Amino Acid Metabolism
33	n-acetylvaline	0.937503	0.969831	-0.0625485	Amino Acid Metabolism
34	4-methylhippuric acid	0.597403	0.810037	-0.46637	Amino Acid Metabolism
35	dl-≈í‚â§-leucine	0.551614	0.796256	0.206142	Amino Acid Metabolism
36	l-cysteine-s-sulfate	0.970332	0.994157	-0.0788481	Amino Acid Metabolism
37	n-acetyl-d-alloisoleucine	0.000393656	0.00787311	-0.931726	Amino Acid Metabolism
38	l-aspartic acid	0.678842	0.839805	0.241779	Amino Acid Metabolism
39	n-acetyl-l-cysteine	0.0568783	0.248196	0.31031	Amino Acid Metabolism
40	4-oxoproline	0.4191	0.703385	0.182715	Amino Acid Metabolism
41	4-methylphenol	0.987529	0.994157	-0.0134832	Amino Acid Metabolism
42	2-anisic acid	0.931807	0.969831	-0.00181953	Aromatic Compound Metabolism
43	pyrogallol	0.136883	0.37667	0.213638	Aromatic Compound Metabolism
44	n-acetylanthranilic acid	0.943331	0.971671	0.0677125	Aromatic Compound Metabolism
45	hydrocinnamic acid	0.0101847	0.076385	0.38849	Aromatic Compound Metabolism
46	phenylglyoxylic acid	0.0184215	0.126319	0.338836	Aromatic Compound Metabolism
47	ferulic acid	0.399	0.685438	0.54738	Aromatic Compound Metabolism
48	4-hydroxybenzaldehyde	0.00717688	0.0599145	0.127264	Aromatic Compound Metabolism
49	salicylic acid	0.457179	0.719867	-0.997994	Aromatic Compound Metabolism
50	glycocholic acid	0.128547	0.362955	0.341575	Bile acids Metabolism
51	glycodeoxycholic acid	0.539889	0.794928	0.0942702	Bile acids Metabolism
52	deoxycholate	0.458916	0.719867	0.124756	Bile acids Metabolism
53	ursodeoxycholate	0.887438	0.950826	-0.0287797	Bile acids Metabolism
54	taurohyocholate	0.833551	0.936064	0.0731093	Bile acids Metabolism
55	taurocholate	0.454729	0.719867	0.399392	Bile acids Metabolism
56	cholic acid	0.230228	0.493346	0.63683	Bile acids Metabolism
57	taurine	0.243933	0.50469	0.352667	Bile acids Metabolism
58	tauroursodeoxycholate	0.218528	0.476787	-0.379837	Bile acids Metabolism
59	taurochenodeoxycholate	0.172626	0.434936	0.220727	Bile acids Metabolism
60	ribose	0.31147	0.593277	0.406585	Carbohydrate Metabolism
61	d-(-)-fructose	0.210425	0.476787	-0.248188	Carbohydrate Metabolism
62	arabinose	0.000289799	0.00671267	-1.73528	Carbohydrate Metabolism
63	gluconic acid	0.990014	0.994157	-0.013632	Carbohydrate Metabolism
64	isocitric acid	0.586716	0.804639	0.21775	Carbohydrate Metabolism
65	d-(-)-ribose	0.985195	0.994157	0.00752159	Carbohydrate Metabolism
66	citrate	0.517748	0.776622	-0.201553	Carbohydrate Metabolism
67	2-furoic acid	0.402695	0.685438	-0.190689	Carbohydrate Metabolism
68	n-acetyl-d-mannosamine	0.869083	0.948002	-0.306575	Carbohydrate Metabolism
69	n-acetylneuraminic acid	0.364619	0.653049	0.411551	Carbohydrate Metabolism
70	2-(6-hydroxyhexyl)-3-methylenesuccinic acid	0.92361	0.969831	-0.158528	Carboxylate Metabolism
71	nitrilotriacetic acid	0.00121624	0.0171704	0.511597	Carboxylate Metabolism
72	cyclohexanecarboxylic acid	0.0847367	0.317763	0.424684	Carboxylate Metabolism
73	levulinic acid	0.139682	0.37667	0.223471	Carboxylate Metabolism
74	2-oxoglutaric acid	0.00938982	0.0726954	0.342437	Carboxylate Metabolism
75	d-hydroxyglutaric acid	0.00396089	0.0413311	0.237961	Carboxylate Metabolism
76	d-saccharic acid	0.0697673	0.283799	0.370641	Carboxylate Metabolism
77	mucic acid	0.567711	0.796256	0.437242	Carboxylate Metabolism
78	malonic acid	1.01226e-11	4.04903e-10	-0.883992	Carboxylate Metabolism
79	l-threonic acid	0.240134	0.50469	-0.293937	Carboxylate Metabolism
80	carboxymethylbutyl hydroxychroman	0.842458	0.936064	0.00064661	Cofactor, Carrier, and Vitamin Metabolism
81	≈í¬•-gluconic acid ≈í¬•-lactone	0.000307664	0.00671267	0.337782	Cofactor, Carrier, and Vitamin Metabolism
82	porphobilinogen	0.566091	0.796256	0.129575	Cofactor, Carrier, and Vitamin Metabolism
83	pantothenic acid	0.000853138	0.0141759	-1.15631	Cofactor, Carrier, and Vitamin Metabolism
84	≈í‚â§-d-glucopyranuronic acid	0.209862	0.476787	0.0441038	Cofactor, Carrier, and Vitamin Metabolism
85	(2r)-2,3-dihydroxypropanoic acid	0.619384	0.821627	0.103274	Fatty Acid and Lipid Metabolism
86	pentadecanoic acid	0.831829	0.936064	-0.0304415	Fatty Acid and Lipid Metabolism
87	1-(1z-octadecenyl)-sn-glycero-3-phosphocholine	0.513992	0.775837	-0.23705	Fatty Acid and Lipid Metabolism
88	16:0-phosphocholine	0.0479545	0.234879	0.982319	Fatty Acid and Lipid Metabolism
89	linoleic acid	0.880533	0.950826	0.165851	Fatty Acid and Lipid Metabolism
90	1-arachidoyl-2-hydroxy-sn-glycero-3-phosphocholine	0.276324	0.552648	-0.268728	Fatty Acid and Lipid Metabolism
91	16:1-phosphocholine	0.228223	0.493346	0.0905109	Fatty Acid and Lipid Metabolism
92	phosphatidylcholine-20:4	0.104538	0.328085	0.43665	Fatty Acid and Lipid Metabolism
93	octadecadienoic acid	0.0132884	0.0966429	0.610251	Fatty Acid and Lipid Metabolism
94	o-decanoyl-l-carnitine	0.0755299	0.297167	0.066719	Fatty Acid and Lipid Metabolism
95	o-acetylserine	0.669482	0.832516	0.0344963	Fatty Acid and Lipid Metabolism
96	o-lauroyl-l-carnitine	0.0038929	0.0413311	1.2095	Fatty Acid and Lipid Metabolism
97	linolenoyl ethanolamide	0.768786	0.904455	-0.202358	Fatty Acid and Lipid Metabolism
98	9s-hydroxy-10e,12z,15z-octadecatrienoic acid	0.73121	0.873086	-0.233161	Fatty Acid and Lipid Metabolism
99	glycerol-myristate	0.633665	0.826734	0.183388	Fatty Acid and Lipid Metabolism
100	1-octadecanamine	0.634737	0.826734	0.131699	Fatty Acid and Lipid Metabolism
101	cis-7,10,13,16,19-docosapentaenoic acid	0.646241	0.826734	0.226754	Fatty Acid and Lipid Metabolism
102	tetradecadien-1-ol	0.539647	0.794928	0.355521	Fatty Acid and Lipid Metabolism
103	2-hydroxy-4-(4-hydroxyphenyl)butanoic acid	0.815367	0.931848	0.311984	Fatty Acid and Lipid Metabolism
104	tetradecanoate	0.54871	0.796256	0.23772	Fatty Acid and Lipid Metabolism
105	monolinolenin	0.929872	0.969831	0.0803539	Fatty Acid and Lipid Metabolism
106	elaidic acid	0.805794	0.926141	0.152945	Fatty Acid and Lipid Metabolism
107	9,12-octadecadiynoic acid	0.0272775	0.172279	-0.615354	Fatty Acid and Lipid Metabolism
108	1,11-undecanedicarboxylic acid	0.214494	0.476787	0.376893	Fatty Acid and Lipid Metabolism
109	3-hydroxydecanoic acid	0.161182	0.422314	0.310419	Fatty Acid and Lipid Metabolism
110	1,2,3-cyclopropanetricarboxylic acid	0.561498	0.796256	0.0632438	Fatty Acid and Lipid Metabolism
111	9-oxootre	0.274838	0.552648	-0.207092	Fatty Acid and Lipid Metabolism
112	(¬¨¬±)9-hpode	0.0033795	0.040554	-0.830951	Fatty Acid and Lipid Metabolism
113	eicosapentaenoic acid	0.610001	0.821627	0.23188	Fatty Acid and Lipid Metabolism
114	glycerol 3-phosphate	0.359715	0.653049	0.425837	Fatty Acid and Lipid Metabolism
115	2-hydroxyvaleric acid	0.446119	0.718471	0.102144	Fatty Acid and Lipid Metabolism
116	tetradecanedioic acid	0.146483	0.390621	-0.396817	Fatty Acid and Lipid Metabolism
117	syringic acid	0.794413	0.92553	0.0577969	Fatty Acid and Lipid Metabolism
118	hexanoic acid	0.0899131	0.323086	0.178626	Fatty Acid and Lipid Metabolism
119	dodecanedioic acid	0.195486	0.459967	0.437549	Fatty Acid and Lipid Metabolism
120	6-hydroxy-2-naphthoic acid	0.105261	0.328085	0.490281	Fatty Acid and Lipid Metabolism
121	heptanoic acid	0.217357	0.476787	0.150696	Fatty Acid and Lipid Metabolism
122	dl-malic acid	0.0342738	0.200627	0.215586	Fatty Acid and Lipid Metabolism
123	azelaic acid	0.0552449	0.245533	-0.417005	Fatty Acid and Lipid Metabolism
124	(15z)-9,12,13-trihydroxy-15-octadecenoic acid	0.000452263	0.00834947	-0.936999	Fatty Acid and Lipid Metabolism
125	arachidonic acid	0.436286	0.717782	0.16345	Hormone Metabolism
126	2,3-dinor-8-iso prostaglandin f2	0.883618	0.950826	0.0921427	Hormone Metabolism
127	8-iso-15-keto-prostaglandin-f2	0.497798	0.759838	-0.278159	Hormone Metabolism
128	5-methoxyindole	3.87973e-14	4.65568e-12	-2.40208	Hormone Metabolism
129	17-6-keto prostaglandin f1	0.40126	0.685438	-0.0183812	Hormone Metabolism
130	2,3-dinor prostaglandin e1	0.186834	0.45293	-0.347362	Hormone Metabolism
131	pseudouridine	0.00555577	0.051284	0.474898	Nucleoside and Nucleotide Metabolism
132	uric acid	0.582356	0.80325	-0.25856	Nucleoside and Nucleotide Metabolism
133	uridine	0.180046	0.445474	0.792777	Nucleoside and Nucleotide Metabolism
134	cyproconazole	0.449044	0.718471	0.0382615	Nucleoside and Nucleotide Metabolism
135	(8-hydroxy-4z,6e,10z,13z,16z,19z-docosahexaenoic acid	0.839664	0.936064	0.352411	Polyunsaturated Fatty Acid Metabolism
136	caffeic acid	0.0419321	0.223638	0.199296	Secondary Metabolite Metabolism
137	2-hydroxycinnamic acid	0.935492	0.969831	-0.087374	Secondary Metabolite Metabolism
138	sinapinic acid	0.872952	0.948002	0.111144	Secondary Metabolite Metabolism
139	d-(-)-quinic acid	7.56983e-08	2.59537e-06	-1.12525	Secondary Metabolite Metabolism
140	1-o-b-d-glucopyranosyl sinapate	0.117639	0.345155	0.430279	Secondary Metabolite Metabolism
141	suberic acid	0.867247	0.948002	0.0411272	Secondary Metabolite Metabolism
142	jasmonic acid	0.13015	0.36321	-0.336741	Secondary Metabolite Metabolism
143	1,2,3,4-tetrahydroisoquinoline-1-acetic acid	0.0461599	0.234879	-0.609192	Secondary Metabolite Metabolism
144	(s)-nicotine	0.500227	0.759838	0.279496	Secondary Metabolite Metabolism
145	dulcitol	0.094465	0.323086	1.20273	Secondary Metabolite Metabolism
146	13s-hydroxy-9z,11e,15z-octadecatrienoic acid	0.173974	0.434936	-0.462888	Secondary Metabolite Metabolism
147	2-aminooctanedioic acid	0.127421	0.362955	0.241356	Secondary Metabolite Metabolism
148	2-(acetylamino)hexanoic acid	0.241293	0.50469	-0.279404	Short-Chain Fatty Acids Metabolism
149	4-hydroxybutyric acid (ghb)	0.661387	0.826734	0.0530479	Short-Chain Fatty Acids Metabolism
150	succinic acid	5.84944e-05	0.00155985	0.488924	Short-Chain Fatty Acids Metabolism
151	succinic semialdehyde	3.36071e-12	2.01643e-10	-1.97307	Short-Chain Fatty Acids Metabolism
152	mevalonic acid	0.375251	0.667113	-0.202827	Terpenoid Metabolism
153	(-)-camphanic acid	0.654302	0.826734	0.173836	Terpenoid Metabolism
154	n-cyclohexanecarbonylpentadecylamine	0.57065	0.796256	0.736094	Unknown Metabolism
155	imino(methyl)phenyl-lambda~4~-sulfane 2,4,6-trimethylbenzenesulfonic acid	0.98389	0.994157	0.028869	Unknown Metabolism
156	sulochrin	0.490644	0.759707	0.158389	Unknown Metabolism
157	n-[(5-methyl-2-phenyl-2h-1,2,3-triazol-4-yl)methyl]-2-thiophenesulfonamide	0.554896	0.796256	0.151977	Unknown Metabolism
158	n1-(3-cyano-4,6-diphenyl-2-pyridyl)-4-methylbenzamide	0.214627	0.476787	-0.186873	Unknown Metabolism
159	n1-(4-chlorophenyl)-3-(1h-pyrrol-1-ylmethyl)piperidine-1-carboxamide	0.408312	0.690104	0.121829	Unknown Metabolism
160	glucuronic acid-3,6-lactone	0.0915778	0.323086	0.288647	Unknown Metabolism
161	7b,9-dihydroxy-3-(hydroxymethyl)-1,1,6,8-tetramethyl-5-oxo-1,1a,1b,4,4a,5,7a,7b,8,9-decahydro-9ah-cyclopropa[3,4]benzo[1,2-e]azulen-9a-yl acetate	0.0670182	0.277317	0.306331	Unknown Metabolism
162	decapropylene glycol	0.0290228	0.175147	0.405895	Unknown Metabolism
163	tributyl phosphate	0.659045	0.826734	-0.11159	Unknown Metabolism
164	1-naphthalenepentanol, decahydro-2-hydroxy-gamma,2,5,5,8a-pentamethyl-, alpha-acetate	0.0907524	0.323086	0.499165	Unknown Metabolism
165	2-hydroxy-1-(4-methoxyphenyl)propyl hexopyranoside	0.101028	0.323291	-0.174479	Unknown Metabolism
166	n-acetyl-l-alanyl-l-alanyl-l-alanine	0.0985744	0.323086	0.192538	Unknown Metabolism
167	(3r,6r)-n-cyclohexyl-6-{[4-(methoxymethyl)-1h-1,2,3-triazol-1-yl]methyl}quinuclidine-3-carboxamide	0.0259415	0.172279	0.33226	Unknown Metabolism
168	1-(≈í‚â§-d-glucopyranosyloxy)-7-methyl-1,4a,5,6,7,7a-hexahydrocyclopenta[c]pyran-4-carboxylic acid	0.273937	0.552648	0.414542	Unknown Metabolism
169	2-[3,8-dihydroxy-8-(hydroxymethyl)-3-methyl-2-oxodecahydro-5-azulenyl]-2-propanyl hexopyranoside	0.194683	0.459967	0.463773	Unknown Metabolism
170	≈í¬±-cyano-3-hydroxycinnamic acid	0.0951042	0.323086	0.285252	Unknown Metabolism
171	glyphosate	0.998726	0.998726	-0.010708	Unknown Metabolism
172	3-tert-butyl-4-hydroxyanisole	0.496543	0.759838	-0.123681	Unknown Metabolism
173	dibutyl adipate	0.0470578	0.234879	-0.960654	Unknown Metabolism
174	capso	0.557565	0.796256	0.585644	Unknown Metabolism
175	1,4-dihydroxy-2-naphthoic acid	0.00097973	0.014696	-0.816662	Unknown Metabolism
176	4-hydroxy-3-methoxyphenylglycol sulfate	0.00438407	0.042087	-0.425656	Unknown Metabolism
177	n-acetyl-4-aminosalicylic acid	0.865449	0.948002	0.142516	Unknown Metabolism
178	np-019483	0.831858	0.936064	-0.00165164	Unknown Metabolism
179	lyso-paf c-18	0.0720519	0.288207	-0.522555	Unknown Metabolism
180	benzalkonium chloride (c12)	0.335223	0.618874	0.909443	Unknown Metabolism
181	phe-val-lys	0.0518212	0.243864	-0.448003	Unknown Metabolism
182	[6,10a-dihydroxy-4-(hydroxymethyl)-4,7,11b-trimethyl-9-oxo-1,2,3,4a,5,6,6a,7,11,11a-decahydronaphtho[2,1-f][1]benzofuran-5-yl] acetate	0.661208	0.826734	-0.47525	Unknown Metabolism
183	6-chloro-5-methyl-1h-1,2,3-benzotriazole	0.898835	0.954515	-0.0360137	Unknown Metabolism
184	np-020535	0.340721	0.624221	0.0129095	Unknown Metabolism
185	np-007966	0.189164	0.453993	0.481551	Unknown Metabolism
186	andrographiside	0.803125	0.926141	0.228066	Unknown Metabolism
187	alachlor esa	0.0785817	0.30131	0.674587	Unknown Metabolism
188	2-butoxyacetic acid	0.689539	0.848664	0.0512865	Unknown Metabolism
189	tri(propylene glycol) butyl ether	0.847807	0.937667	0.306945	Unknown Metabolism
190	4-[5-(trifluoromethyl)-1h-pyrazol-3-yl]pyridine	0.00361266	0.0412875	0.750029	Unknown Metabolism
191	(1r,3s,4s,5r,7r)-4-(3-hydroxybutyl)-5-methyl-10-methylidene-8-oxatricyclo[5.3.0.0‚àö¬¢l,‚àö¬¢¬¨√Ö¬¨¬µ]decan-9-one	0.118961	0.345155	0.36768	Unknown Metabolism
192	octyl glucoside	0.00419158	0.0419158	-0.752072	Unknown Metabolism
193	diphenylsulfone	0.0491216	0.235784	0.801859	Unknown Metabolism
194	l-cysteic acid	0.301227	0.578356	0.193131	Unknown Metabolism
195	np-020292	0.759573	0.898017	-0.318675	Unknown Metabolism
196	5-[({(2r,4s,5r)-5-[1-methyl-3-(2-thienyl)-1h-pyrazol-5-yl]-1-azabicyclo[2.2.2]oct-2-yl}methyl)amino]-5-oxopentanoic acid	0.163647	0.422314	0.416678	Unknown Metabolism
197	2,4,6-triallyloxy-1,3,5-triazine	0.578527	0.802581	0.0180963	Unknown Metabolism
198	1-(2-furylmethyl)-5-oxopyrrolidine-3-carboxylic acid	0.806514	0.926141	0.0672733	Unknown Metabolism
199	n-isobutyrylglycine	0.983966	0.994157	-0.00176028	Unknown Metabolism
200	ethylmalonic acid	0.319085	0.599077	-0.144942	Unknown Metabolism
201	np-019722	0.21068	0.476787	0.130981	Unknown Metabolism
202	cytidine-5'-diphosphate	0.441855	0.718471	0.325817	Unknown Metabolism
203	9(10)-epome	0.333624	0.618874	-0.333136	Unknown Metabolism
204	n-(1-benzylpiperidin-4-yl)-6-phenylthieno[3,2-d]pyrimidin-4-amine	0.00190762	0.0254349	-0.862956	Unknown Metabolism
205	{(1r,2r)-2-[(2z)-5-(hexopyranosyloxy)-2-penten-1-yl]-3-oxocyclopentyl}acetic acid	0.566486	0.796256	-0.167754	Unknown Metabolism
206	phe-leu-lys	0.627115	0.826734	0.217283	Unknown Metabolism
207	3-tert-butyladipic acid	0.83823	0.936064	-0.539131	Unknown Metabolism
208	(1s,4r,6s)-1,3,3-trimethyl-2-oxabicyclo[2.2.2]oct-6-yl hexopyranoside	0.916345	0.968822	-0.097975	Unknown Metabolism
209	fenhexamid	0.00723967	0.0599145	-0.656208	Unknown Metabolism
210	dl-≈í¬±-methoxyphenylacetic acid	0.0890641	0.323086	-0.557125	Unknown Metabolism
211	2-methylbenzoic acid	0.0990683	0.323086	0.237161	Unknown Metabolism
212	1,9b-dihydroxy-6,6,9a-trimethyl-5,5a,6,7,8,9,9a,9b-octahydronaphtho[1,2-c]furan-3(1h)-one	0.115599	0.345155	0.429756	Unknown Metabolism
213	3-o-≈í‚â§-d-glucopyranosylandrographolide	0.0790938	0.30131	0.4777	Unknown Metabolism
214	1-benzyl-3-({(2r,4s,5r)-5-[6-(4-fluorophenyl)-2-methyl-4-pyrimidinyl]-1-azabicyclo[2.2.2]oct-2-yl}methyl)urea	0.0579334	0.248286	0.57942	Unknown Metabolism
215	dibutyl phthalate	0.386111	0.677167	-0.112002	Unknown Metabolism
216	diethyl phthalate	0.186282	0.45293	0.33452	Unknown Metabolism
217	np-020515	0.00602753	0.053578	-0.55176	Unknown Metabolism
218	4-acetamidobenzoic acid	0.116983	0.345155	-1.20757	Unknown Metabolism
219	4-{[5-(6-hydroxy-5,5,8a-trimethyl-2-methylenedecahydro-1-naphthalenyl)-3-methylpentyl]oxy}-4-oxobutanoic acid	0.0531908	0.245496	0.360098	Unknown Metabolism
220	2-norbornaneacetic acid	0.651124	0.826734	-0.0850961	Unknown Metabolism
221	np-018661	0.00768027	0.0614422	-0.207557	Unknown Metabolism
222	corchorifatty acid f	0.000885991	0.0141759	-1.17443	Unknown Metabolism
223	3-methyladipic acid	0.28542	0.566123	0.182622	Unknown Metabolism
224	1-(carboxymethyl)cyclohexanecarboxylic acid	0.794046	0.92553	-0.0987668	Unknown Metabolism
225	mab-chminaca metabolite m11	0.59258	0.808063	-0.0981622	Unknown Metabolism
226	endothal	0.469103	0.731069	0.479552	Unknown Metabolism
227	phenyllactic acid	7.73006e-06	0.000231902	-1.46318	Unknown Metabolism
228	1-[3-(methylsulfanyl)phenyl]-3-({(2r,4s,5s)-5-[(4-phenyl-1-piperazinyl)methyl]-1-azabicyclo[2.2.2]oct-2-yl}methyl)urea	0.0291911	0.175147	0.453917	Unknown Metabolism
229	cmpf	0.119366	0.345155	0.326944	Unknown Metabolism
230	methylsuccinic acid	0.117788	0.345155	0.168137	Unknown Metabolism
231	3,8,9-trihydroxy-10-propyl-3,4,5,8,9,10-hexahydro-2h-oxecin-2-one	0.162908	0.422314	-0.327709	Unknown Metabolism
232	np-018716	0.712693	0.863862	0.159183	Unknown Metabolism
233	5-hydroxyindole-3-acetic acid	1.5416e-14	3.69983e-12	-3.49307	Unknown Metabolism
234	np-016455	0.0971221	0.323086	-0.539613	Unknown Metabolism
235	≈í¬±-aspartylphenylalanine	0.242738	0.50469	0.409001	Unknown Metabolism
236	n-lauroylsarcosine	0.657404	0.826734	-0.615415	Unknown Metabolism
237	(2e)-4-hydroxy-4-{4-hydroxy-2-[(1e)-6-hydroxy-1-hepten-1-yl]cyclopentyl}-2-butenoic acid	0.615551	0.821627	-0.100445	Unknown Metabolism
238	isophthalic acid	0.171844	0.434936	0.372747	Unknown Metabolism
239	methyl 2-[(methylsulfonyl)amino]benzoate	0.386549	0.677167	-0.247501	Unknown Metabolism
240	3-hydroxy-3-methylglutaric acid	6.90755e-12	3.31562e-10	-1.78032	Unknown Metabolism
