# Supplementary material for: A multi omics approach unravels metagenomic and metabolic alterations of a probiotic in rainbow trout (Oncorhynchus mykiss)
Source: Research Square preprint supplement (doi:10.21203/rs.3.rs-459562/v1), 2021-05-05
Supplement: Supplementary file 2 [file aa624439d04aa384cee7f070.xlsx]

## Sheet: Sheet1
ID	pval	Adj. pval	Fold Change	CF kingdom	CF MFramework	CF superclass	CF class	CF subclass	CF Dparent	Spectral Annotation
114300	0.767705	0.875184	-0.128391	Organic compounds	Aromatic heteropolycyclic compounds	Alkaloids and derivatives	Carboxylic acids and derivatives	NA	Cytisine and derivatives	NA
90000	0.100132	0.287589	-0.697335	no matches	no matches	no matches	no matches	no matches	no matches	NA
65357	0.398269	0.620578	-0.062101	no matches	no matches	no matches	no matches	no matches	no matches	NA
110996	0.00191556	0.0150003	0.685155	no matches	no matches	no matches	no matches	no matches	no matches	NA
129742	0.323963	0.563026	-0.389199	Organic compounds	Aromatic heteropolycyclic compounds	Lipids and lipid-like molecules	Steroids and steroid derivatives	NA	Triterpenoids	NA
14219	0.508989	0.711775	-0.155636	Organic compounds	Aliphatic acyclic compounds	Lipids and lipid-like molecules	Fatty Acyls	Fatty acids and conjugates	Medium-chain fatty acids	NA
103378	0.357546	0.59271	-0.374534	no matches	no matches	no matches	no matches	no matches	no matches	NA
112478	0.525391	0.728312	0.37178	Organic compounds	Aromatic heteropolycyclic compounds	Phenylpropanoids and polyketides	Coumarins and derivatives	NA	Coumarins and derivatives	NA
147951	0.788022	0.890128	0.112617	Organic compounds	Aliphatic acyclic compounds	Organic oxygen compounds	Organooxygen compounds	Alcohols and polyols	Secondary alcohols	NA
112208	0.510089	0.711775	0.400729	no matches	no matches	no matches	no matches	no matches	no matches	NA
122108	0.269043	0.508875	-0.041418	Organic compounds	Aliphatic heteropolycyclic compounds	Lipids and lipid-like molecules	Prenol lipids	Amino acids, peptides, and analogues	Triterpenoids	NA
124731	0.381177	0.60612	-0.422469	Organic compounds	Aromatic heteropolycyclic compounds	Lipids and lipid-like molecules	Prenol lipids	Sesquiterpenoids	Triterpenoids	NA
112049	0.00745207	0.0445321	0.286644	no matches	no matches	no matches	no matches	no matches	no matches	NA
70477	0.00874519	0.0506265	-0.470204	Organic compounds	Aromatic heteropolycyclic compounds	Lipids and lipid-like molecules	Prenol lipids	NA	Long-chain fatty acids	Spectral Match to 9-OxoOTrE from NIST14
116055	0.267895	0.508875	0.513872	Organic compounds	Aliphatic homopolycyclic compounds	Lipids and lipid-like molecules	Prenol lipids	NA	Diterpenoids	NA
110110	0.859974	0.92757	0.240681	no matches	no matches	no matches	no matches	no matches	no matches	NA
118623	0.308134	0.549561	0.264552	Organic compounds	Aromatic heteropolycyclic compounds	Lipids and lipid-like molecules	Prenol lipids	NA	Triterpenoids	Spectral Match to Cholic acid from NIST14
64511	0.28293	0.52282	-0.366669	no matches	no matches	no matches	no matches	no matches	no matches	NA
117698	0.527805	0.728312	-0.0644769	no matches	no matches	no matches	no matches	no matches	no matches	NA
81279	0.319468	0.558315	-0.172362	Organic compounds	Aliphatic homopolycyclic compounds	Lipids and lipid-like molecules	Prenol lipids	NA	Trimethylsilyl esters	NA
48351	0.805287	0.894724	-0.152903	Organic compounds	Aliphatic acyclic compounds	Organoheterocyclic compounds	Carboxylic acids and derivatives	Amino acids, peptides, and analogues	Carbamate esters	NA
121995	0.365056	0.598466	-0.345958	no matches	no matches	no matches	no matches	no matches	no matches	NA
49032	0.595254	0.762633	-0.161551	Organic compounds	Aromatic heteromonocyclic compounds	Organoheterocyclic compounds	Prenol lipids	NA	Alkyl-phenylketones	NA
148172	0.588505	0.761051	-0.120323	Organic compounds	Aliphatic heteropolycyclic compounds	Lipids and lipid-like molecules	Prenol lipids	Triterpenoids	Triterpenoids	NA
140111	0.74945	0.86502	-0.122765	Organic compounds	Aromatic heteropolycyclic compounds	Lipids and lipid-like molecules	Steroids and steroid derivatives	NA	Triterpenoids	NA
113331	0.481679	0.692497	-0.284459	no matches	no matches	no matches	no matches	no matches	no matches	NA
149116	0.621753	0.773019	-0.14043	Organic compounds	Aromatic heteropolycyclic compounds	Lipids and lipid-like molecules	Steroids and steroid derivatives	NA	Triterpenoids	NA
117679	0.164839	0.370139	-0.0908051	Organic compounds	Aromatic heteropolycyclic compounds	Lipids and lipid-like molecules	Prenol lipids	NA	Steroidal saponins	Massbank:PR100120 Cytidine-5'-diphosphate|CDP|Cytidine 5'-Diphosphoric Acid
138106	0.132301	0.328976	0.304536	no matches	no matches	no matches	no matches	no matches	no matches	NA
77387	0.184868	0.400547	-0.385076	no matches	no matches	no matches	no matches	no matches	no matches	NA
5070	0.99839	0.99839	-0.00850926	Organic compounds	Aliphatic acyclic compounds	Lipids and lipid-like molecules	Fatty Acyls	NA	Medium-chain fatty acids	NA
98846	0.0252243	0.109948	-0.0063877	no matches	no matches	no matches	no matches	no matches	no matches	NA
100641	0.0290429	0.120228	-0.752254	Organic compounds	Aromatic heteropolycyclic compounds	Organoheterocyclic compounds	Fatty Acyls	NA	N-acyl amines	NA
47410	0.386658	0.610724	-0.208085	Organic compounds	Aliphatic acyclic compounds	Organoheterocyclic compounds	Diazanaphthalenes	Hydrazines and derivatives	Semicarbazones	NA
80611	0.00479426	0.0314385	-1.45319	no matches	no matches	no matches	no matches	no matches	no matches	NA
118784	0.13878	0.339393	0.0236687	Organic compounds	Aromatic heteropolycyclic compounds	Organoheterocyclic compounds	Piperidines	NA	Phenylpiperidines	NA
113917	0.55368	0.741911	0.221423	no matches	no matches	no matches	no matches	no matches	no matches	NA
145056	0.665257	0.804191	0.150508	Organic compounds	Aliphatic heteropolycyclic compounds	Lipids and lipid-like molecules	Prenol lipids	Diterpenoids	Hybrid peptides	NA
99605	0.612904	0.770697	-0.105472	no matches	no matches	no matches	no matches	no matches	no matches	3-Amino-3-(4-hydroxyphenyl)propanoate;(S)-beta-Tyrosine;L-Tyrosine
33638	0.517901	0.720009	-0.244621	Organic compounds	Aliphatic heteropolycyclic compounds	Organoheterocyclic compounds	Indoles and derivatives	NA	Indoles and derivatives	NA
122313	0.175672	0.38627	0.294929	no matches	no matches	no matches	no matches	no matches	no matches	NA
130464	0.000319438	0.00348094	-1.93988	no matches	no matches	no matches	no matches	no matches	no matches	NA
118925	0.00154094	0.0125476	1.63367	Organic compounds	Aromatic heteropolycyclic compounds	Lipids and lipid-like molecules	Prenol lipids	Diterpenoids	Diterpenoids	NA
95271	0.757817	0.869312	0.0732426	no matches	no matches	no matches	no matches	no matches	no matches	NA
113457	0.920931	0.956919	-0.0170096	Organic compounds	Aliphatic acyclic compounds	Lipids and lipid-like molecules	Fatty Acyls	NA	Acyl carnitines	NA
112206	0.0210903	0.097068	0.37916	Organic compounds	Aliphatic homopolycyclic compounds	Lipids and lipid-like molecules	Prenol lipids	Sesterterpenoids	Sesterterpenoids	NA
83097	0.0482132	0.168519	0.324107	Organic compounds	Aliphatic acyclic compounds	Lipids and lipid-like molecules	Fatty Acyls	Fatty acid esters	Acyl carnitines	NA
134705	0.00267175	0.0196017	-0.36467	Organic compounds	Aromatic heteropolycyclic compounds	Lipids and lipid-like molecules	Prenol lipids	NA	Macrolactams	NA
87121	0.0398859	0.147777	-0.286812	no matches	no matches	no matches	no matches	no matches	no matches	NA
57007	0.488384	0.698542	0.299751	Organic compounds	Aromatic heteropolycyclic compounds	Organoheterocyclic compounds	Piperidines	NA	Piperidinones	NA
75575	0.541984	0.737433	-0.266851	Organic compounds	Aliphatic acyclic compounds	Lipids and lipid-like molecules	Prenol lipids	Sesquiterpenoids	Sesquiterpenoids	NA
115829	0.152637	0.355882	-0.147025	Organic compounds	Aromatic heteropolycyclic compounds	Organoheterocyclic compounds	Carboxylic acids and derivatives	NA	Alpha amino acids	NA
69475	0.5927	0.762633	-0.27083	Organic compounds	Aliphatic heteropolycyclic compounds	Organoheterocyclic compounds	Piperidines	Piperidinones	Piperidinones	N-(2-Phenylethyl)-acetamide;N6-Methyl-L-lysine
95126	0.741428	0.859778	0.0480443	Organic compounds	Aliphatic homopolycyclic compounds	Lipids and lipid-like molecules	Prenol lipids	NA	Diterpenoids	NA
127160	0.148519	0.350217	-0.0179016	Organic compounds	Aromatic heteropolycyclic compounds	Lipids and lipid-like molecules	Steroids and steroid derivatives	NA	Triterpenoids	NA
146886	0.3842	0.608317	-0.0198512	Organic compounds	Aliphatic heteropolycyclic compounds	Lipids and lipid-like molecules	Prenol lipids	Triterpenoids	Triterpenoids	NA
128452	0.919816	0.956919	0.0597889	Organic compounds	Aromatic heteropolycyclic compounds	Lipids and lipid-like molecules	Prenol lipids	NA	Acyl carnitines	tauroursodeoxycholic acid
106425	0.613685	0.770697	-0.2403	no matches	no matches	no matches	no matches	no matches	no matches	NA
85670	0.391196	0.612862	0.0540473	no matches	no matches	no matches	no matches	no matches	no matches	NA
103752	0.312519	0.551373	0.00950745	Organic compounds	Aromatic heteropolycyclic compounds	Lipids and lipid-like molecules	Prenol lipids	NA	Acyl carnitines	NA
137929	0.363884	0.597868	0.0348195	Organic compounds	Aliphatic acyclic compounds	Lipids and lipid-like molecules	Fatty Acyls	Fatty acid esters	Acyl carnitines	NA
105863	0.00679534	0.0423138	2.00277	Organic compounds	Aromatic heteropolycyclic compounds	Lipids and lipid-like molecules	Prenol lipids	Diterpenoids	Phenylpiperazines	NA
52521	0.696048	0.827883	-0.0381525	no matches	no matches	no matches	no matches	no matches	no matches	NA
100840	0.574374	0.757315	0.117673	Organic compounds	Aromatic heteropolycyclic compounds	Lipids and lipid-like molecules	Prenol lipids	Diterpenoids	Phenylpiperidines	NA
4869	0.0131462	0.0671814	-0.784215	Organic compounds	Aliphatic acyclic compounds	Lipids and lipid-like molecules	Fatty Acyls	NA	Stilbenes	NA
79332	0.0439368	0.158045	-0.139169	Organic compounds	Aliphatic acyclic compounds	Lipids and lipid-like molecules	Prenol lipids	Sesquiterpenoids	Sesquiterpenoids	NA
75084	0.848197	0.924286	0.0505015	Organic compounds	Aromatic heteropolycyclic compounds	Alkaloids and derivatives	Plumeran-type alkaloids	NA	Plumeran-type alkaloids	NA
124974	0.681593	0.815929	-0.174064	Organic compounds	Aromatic heteropolycyclic compounds	Lipids and lipid-like molecules	Prenol lipids	NA	Aromatic monoterpenoids	NA
52849	0.000806868	0.00729133	0.814787	no matches	no matches	no matches	no matches	no matches	no matches	NA
573	0.858134	0.92757	0.215042	Organic compounds	Aromatic homomonocyclic compounds	Benzenoids	Benzene and substituted derivatives	NA	Aniline and substituted anilines	NA
116673	0.626723	0.775295	0.329859	Organic compounds	Aromatic heteromonocyclic compounds	Benzenoids	Benzene and substituted derivatives	NA	Phenylazetidines	NA
112047	7.84e-06	0.000138385	0.865769	Organic compounds	Aromatic heteropolycyclic compounds	Lipids and lipid-like molecules	Carboxylic acids and derivatives	Amino acids, peptides, and analogues	Macrolactams	NA
96659	0.102905	0.290346	0.510981	Organic compounds	Aliphatic acyclic compounds	Organic acids and derivatives	Carboxylic acids and derivatives	Amino acids, peptides, and analogues	Alpha amino acid amides	NA
81351	0.201612	0.427843	0.334432	Organic compounds	Aliphatic heteropolycyclic compounds	Lipids and lipid-like molecules	Prenol lipids	NA	Sesquiterpenoids	NA
139728	1.41e-22	2.09e-20	-5.89473	Organic compounds	Aromatic heteropolycyclic compounds	Lipids and lipid-like molecules	Carboxylic acids and derivatives	NA	Naphthothiazoles	NA
36092	0.446575	0.656698	0.00238041	Organic compounds	Aliphatic acyclic compounds	Lipids and lipid-like molecules	Fatty Acyls	NA	Medium-chain fatty acids	NA
83333	0.0729436	0.227522	-0.544333	Organic compounds	Aromatic heteropolycyclic compounds	Lipids and lipid-like molecules	Prenol lipids	NA	Long-chain fatty acids	NA
116948	0.143283	0.344513	-0.137299	no matches	no matches	no matches	no matches	no matches	no matches	NA
85100	0.0958908	0.278647	0.120797	Organic compounds	Aromatic heteropolycyclic compounds	Organoheterocyclic compounds	Organooxygen compounds	NA	Sesquiterpenoids	NA
63278	0.901069	0.949775	0.115588	no matches	no matches	no matches	no matches	no matches	no matches	NA
100850	0.193077	0.413497	0.296509	no matches	no matches	no matches	no matches	no matches	no matches	NA
47432	0.1186	0.312347	0.277432	Organic compounds	Aliphatic acyclic compounds	Lipids and lipid-like molecules	Fatty Acyls	NA	Fatty alcohols	Spectral Match to Dodecanedioic acid from NIST14
79908	0.321332	0.560251	0.572334	Organic compounds	Aromatic heteropolycyclic compounds	Lipids and lipid-like molecules	Prenol lipids	NA	Diterpenoids	N2-Acetyl-L-lysine;N6-Acetyl-L-lysine
131401	0.272192	0.511914	0.0751001	Organic compounds	Aromatic heteropolycyclic compounds	Lipids and lipid-like molecules	Prenol lipids	NA	Acyl carnitines	Spectral Match to Tauroursodeoxycholic acid from NIST14
134755	5.27e-06	0.000100103	-0.912928	Organic compounds	Aliphatic homopolycyclic compounds	Lipids and lipid-like molecules	Prenol lipids	Triterpenoids	Triterpenoids	NA
113918	0.913423	0.953311	0.0583348	no matches	no matches	no matches	no matches	no matches	no matches	NA
16030	0.829173	0.913536	-0.0108998	Organic compounds	Aliphatic acyclic compounds	Organoheterocyclic compounds	Organooxygen compounds	NA	Terpene lactones	NA
140340	0.29532	0.533947	-0.36301	Organic compounds	Aliphatic heteropolycyclic compounds	Lipids and lipid-like molecules	Steroids and steroid derivatives	Steroidal glycosides	Triterpenoids	NA
128426	0.000437233	0.00456323	-1.09304	Organic compounds	Aromatic heteropolycyclic compounds	Lipids and lipid-like molecules	Prenol lipids	NA	Eudesmane, isoeudesmane or cycloeudesmane sesquiterpenoids	NA
96929	0.377129	0.603569	-0.21751	no matches	no matches	no matches	no matches	no matches	no matches	NA
121481	0.00706847	0.0435223	-1.14894	Organic compounds	Aromatic heteromonocyclic compounds	Lipids and lipid-like molecules	Prenol lipids	NA	Aromatic monoterpenoids	NA
105466	5.99e-10	1.85e-08	2.30331	no matches	no matches	no matches	no matches	no matches	no matches	NA
112379	0.235364	0.46883	0.164835	Organic compounds	Aliphatic acyclic compounds	Lipids and lipid-like molecules	Prenol lipids	Diterpenoids	Aconitane-type diterpenoid alkaloids	NA
96062	0.550025	0.741911	-0.0417629	no matches	no matches	no matches	no matches	no matches	no matches	NA
129989	0.0349533	0.135604	-0.666487	Organic compounds	Aromatic heteropolycyclic compounds	Lipids and lipid-like molecules	Carboxylic acids and derivatives	NA	Hybrid peptides	NA
134701	0.0105206	0.0579524	0.393464	Organic compounds	Aromatic heteropolycyclic compounds	Benzenoids	Benzene and substituted derivatives	NA	Macrolactams	NA
130127	0.244874	0.481172	0.301328	Organic compounds	Aromatic heteropolycyclic compounds	Organic acids and derivatives	Carboxylic acids and derivatives	Amino acids, peptides, and analogues	Macrolactams	NA
135246	7.41e-38	5.49e-35	-6.45322	Organic compounds	Aromatic heteropolycyclic compounds	Lipids and lipid-like molecules	Carboxylic acids and derivatives	NA	Naphthothiazoles	D-Norvaline;L-Norvaline
103691	0.326875	0.564603	-0.514278	Organic compounds	Aliphatic acyclic compounds	Lipids and lipid-like molecules	Fatty Acyls	Fatty acids and conjugates	Very long-chain fatty acids	NA
97239	0.11304	0.306824	-0.343803	Organic compounds	Aromatic heteropolycyclic compounds	Lipids and lipid-like molecules	Prenol lipids	NA	Piperidinones	NA
85663	0.0297515	0.122477	0.330364	no matches	no matches	no matches	no matches	no matches	no matches	NA
130445	0.00112494	0.00958141	-0.0199962	no matches	no matches	no matches	no matches	no matches	no matches	NA
140319	0.000114719	0.00146564	-0.499982	no matches	no matches	no matches	no matches	no matches	no matches	NA
130444	1.12e-13	5.21e-12	1.59296	no matches	no matches	no matches	no matches	no matches	no matches	D-Lysopine
118639	0.544941	0.738211	0.00181164	Organic compounds	Aliphatic homopolycyclic compounds	Lipids and lipid-like molecules	Steroids and steroid derivatives	Cholestane steroids	Cholesterols and derivatives	NA
105937	0.0230673	0.102969	0.739881	no matches	no matches	no matches	no matches	no matches	no matches	NA
119479	0.0634447	0.20802	0.468023	no matches	no matches	no matches	no matches	no matches	no matches	NA
75058	0.0212618	0.0972529	-0.627219	no matches	no matches	no matches	no matches	no matches	no matches	NA
79376	0.0859406	0.25887	-0.845257	no matches	no matches	no matches	no matches	no matches	no matches	NA
95988	0.0396394	0.147602	-0.360357	no matches	no matches	no matches	no matches	no matches	no matches	NA
80130	0.26656	0.508875	0.615107	Organic compounds	Aromatic heteropolycyclic compounds	Organoheterocyclic compounds	Benzene and substituted derivatives	NA	Benzimidazoles	NA
123983	1.77e-18	1.45e-16	-2.64439	no matches	no matches	no matches	no matches	no matches	no matches	NA
109635	0.00476691	0.0314385	0.668921	Organic compounds	Aromatic heteromonocyclic compounds	Lipids and lipid-like molecules	Prenol lipids	Monoterpenoids	Long-chain fatty acids	NA
81323	0.40274	0.623028	0.29846	no matches	no matches	no matches	no matches	no matches	no matches	NA
61215	0.278716	0.520612	-0.15068	no matches	no matches	no matches	no matches	no matches	no matches	NA
59920	0.882938	0.941209	0.0832169	no matches	no matches	no matches	no matches	no matches	no matches	Spectral Match to 2,4,6-Triallyloxy-1,3,5-triazine from NIST14
117130	0.800594	0.894283	0.173712	no matches	no matches	no matches	no matches	no matches	no matches	NA
128049	0.00109909	0.00947005	-0.798156	Organic compounds	Aromatic heteropolycyclic compounds	Lipids and lipid-like molecules	Steroids and steroid derivatives	NA	Triterpenoids	NA
149168	0.241546	0.477296	-0.163359	Organic compounds	Aliphatic heteropolycyclic compounds	Lipids and lipid-like molecules	Steroids and steroid derivatives	Bile acids, alcohols and derivatives	Triterpenoids	NA
14276	0.88405	0.941209	-0.00750253	Organic compounds	Aliphatic acyclic compounds	Lipids and lipid-like molecules	Fatty Acyls	Fatty acids and conjugates	Medium-chain fatty acids	NA
134683	0.408959	0.62741	0.222838	no matches	no matches	no matches	no matches	no matches	no matches	NA
12938	0.55311	0.741911	-0.264086	Organic compounds	Aliphatic acyclic compounds	Lipids and lipid-like molecules	Fatty Acyls	NA	Orthocarboxylic acid derivatives	Carnosine
115806	2.96e-19	3.14e-17	3.5244	no matches	no matches	no matches	no matches	no matches	no matches	Carnosine
64452	0.865705	0.931204	0.157455	Organic compounds	Aromatic heteropolycyclic compounds	Organoheterocyclic compounds	Piperidines	NA	Piperidinones	NA
118764	0.000295733	0.00327072	0.597997	Organic compounds	Aromatic heteropolycyclic compounds	Organoheterocyclic compounds	Piperidines	NA	Phenylpiperidines	NG,NG-Dimethyl-L-arginine
112453	0.625036	0.775295	-0.332722	Organic compounds	Aromatic heteropolycyclic compounds	Organoheterocyclic compounds	Carboxylic acids and derivatives	Amino acids, peptides, and analogues	Phenylpyrazoles	NA
53788	0.499403	0.708923	0.278666	no matches	no matches	no matches	no matches	no matches	no matches	NA
49062	0.527145	0.728312	0.0371766	Organic compounds	Aliphatic heteropolycyclic compounds	Organoheterocyclic compounds	Indoles and derivatives	NA	Indoles and derivatives	NA
119625	0.00107089	0.00933566	-0.683066	Organic compounds	Aliphatic heteromonocyclic compounds	Lipids and lipid-like molecules	Prenol lipids	Diterpenoids	Diterpene lactones	NA
116950	0.14507	0.344513	-0.0822371	no matches	no matches	no matches	no matches	no matches	no matches	NA
97155	0.0179475	0.086592	0.495704	Organic compounds	Aliphatic acyclic compounds	Lipids and lipid-like molecules	Fatty Acyls	Fatty acid esters	Acyl carnitines	NA
116121	0.550814	0.741911	0.201541	Organic compounds	Aliphatic homopolycyclic compounds	Lipids and lipid-like molecules	Prenol lipids	NA	Cholesterols and derivatives	NA
119005	0.647731	0.794497	-0.190046	Organic compounds	Aromatic heteropolycyclic compounds	Lipids and lipid-like molecules	Prenol lipids	NA	Sesquiterpenoids	NA
101291	0.983126	0.991152	-0.0447739	no matches	no matches	no matches	no matches	no matches	no matches	NA
96415	0.574348	0.757315	-0.321606	no matches	no matches	no matches	no matches	no matches	no matches	NA
120145	0.390352	0.612862	0.14462	no matches	no matches	no matches	no matches	no matches	no matches	NA
121596	0.650767	0.79574	-0.139817	Organic compounds	Aliphatic homopolycyclic compounds	Lipids and lipid-like molecules	Steroids and steroid derivatives	Diterpenoids	Diterpenoids	NA
145730	0.0517582	0.177559	0.851201	Organic compounds	Aromatic heteropolycyclic compounds	Lipids and lipid-like molecules	Steroids and steroid derivatives	NA	Triterpenoids	NA
128039	0.0017058	0.0137391	0.330376	Organic compounds	Aromatic heteropolycyclic compounds	Lipids and lipid-like molecules	Prenol lipids	NA	Eudesmane, isoeudesmane or cycloeudesmane sesquiterpenoids	NA
97194	0.138559	0.339393	-0.171263	no matches	no matches	no matches	no matches	no matches	no matches	NA
83228	0.835246	0.916851	0.0622776	no matches	no matches	no matches	no matches	no matches	no matches	NA
106141	0.374527	0.602006	0.0207411	Organic compounds	Aromatic heteropolycyclic compounds	Lipids and lipid-like molecules	Carboxylic acids and derivatives	NA	Dipeptides	NA
91695	0.290636	0.531756	0.0541079	Organic compounds	Aliphatic acyclic compounds	Lipids and lipid-like molecules	Fatty Acyls	Fatty acid esters	Acyl carnitines	NA
62746	0.978554	0.990806	-0.0340195	Organic compounds	Aliphatic acyclic compounds	Lipids and lipid-like molecules	Prenol lipids	NA	Carboximidic acids	NA
113922	0.118833	0.312347	0.4491	no matches	no matches	no matches	no matches	no matches	no matches	NA
63468	0.946594	0.975557	-0.0222067	Organic compounds	Aromatic heteropolycyclic compounds	Lipids and lipid-like molecules	Prenol lipids	NA	Long-chain fatty acids	NA
96627	0.759035	0.869312	-0.199213	Organic compounds	Aromatic heteropolycyclic compounds	Lipids and lipid-like molecules	Prenol lipids	NA	Triterpenoids	NA
121123	0.12532	0.320215	0.095657	Organic compounds	Aliphatic heteropolycyclic compounds	Lipids and lipid-like molecules	Prenol lipids	Triterpenoids	Triterpenoids	NA
97154	0.492165	0.701336	-0.270029	Organic compounds	Aliphatic heteropolycyclic compounds	Lipids and lipid-like molecules	Prenol lipids	NA	Quinuclidines	NA
126561	0.614658	0.770697	-0.131987	no matches	no matches	no matches	no matches	no matches	no matches	NA
47412	0.500846	0.709612	0.0661223	no matches	no matches	no matches	no matches	no matches	no matches	NA
121570	8.32e-14	4.11e-12	-2.54968	no matches	no matches	no matches	no matches	no matches	no matches	NA
106876	0.795676	0.894283	0.00928666	Organic compounds	Aromatic heteropolycyclic compounds	Lipids and lipid-like molecules	Prenol lipids	NA	Eudesmanolides, secoeudesmanolides, and derivatives	NA
139957	0.424328	0.63878	0.263638	Organic compounds	Aromatic heteropolycyclic compounds	Lipids and lipid-like molecules	Steroids and steroid derivatives	NA	Triterpenoids	NA
101296	0.352574	0.590122	0.107039	Organic compounds	Aliphatic heteromonocyclic compounds	Lipids and lipid-like molecules	Fatty Acyls	NA	Acyl carnitines	NA
103066	0.831655	0.914327	-0.106133	Organic compounds	Aliphatic heteropolycyclic compounds	Organoheterocyclic compounds	Prenol lipids	NA	Aromatic monoterpenoids	NA
116484	0.212839	0.443016	0.163911	Organic compounds	Aliphatic homopolycyclic compounds	Lipids and lipid-like molecules	Prenol lipids	Sesterterpenoids	Sesterterpenoids	NA
103065	0.0958847	0.278647	0.46434	Organic compounds	Aliphatic acyclic compounds	Lipids and lipid-like molecules	Fatty Acyls	NA	Acyl carnitines	NA
105861	0.807721	0.895989	-0.114339	no matches	no matches	no matches	no matches	no matches	no matches	NA
124073	0.342803	0.579948	-0.0220288	Organic compounds	Aromatic heteropolycyclic compounds	Lipids and lipid-like molecules	Prenol lipids	Triterpenoids	Triterpenoids	NA
119031	0.839243	0.91858	0.121567	Organic compounds	Aromatic heteropolycyclic compounds	Organoheterocyclic compounds	Carboxylic acids and derivatives	NA	Sesquiterpenoids	NA
118837	0.136505	0.337168	0.336761	no matches	no matches	no matches	no matches	no matches	no matches	NA
9221	0.387369	0.610724	0.872426	Organic compounds	Aliphatic acyclic compounds	Benzenoids	Prenol lipids	NA	Tetralins	Spectral Match to Ile-Glu-Lys from NIST14
69434	0.586831	0.761051	0.397414	Organic compounds	Aliphatic acyclic compounds	Lipids and lipid-like molecules	Prenol lipids	NA	Triterpenoids	Spectral Match to N-Lauroylsarcosine from NIST14
109761	0.205445	0.433717	0.347728	Organic compounds	Aliphatic heteropolycyclic compounds	Lipids and lipid-like molecules	Prenol lipids	NA	Diterpene lactones	NA
112374	0.0108299	0.0589051	0.808634	no matches	no matches	no matches	no matches	no matches	no matches	NA
112404	0.00136672	0.0113791	1.58906	no matches	no matches	no matches	no matches	no matches	no matches	NA
81270	2.59e-12	1.06e-10	-0.998185	Organic compounds	Aliphatic homopolycyclic compounds	Lipids and lipid-like molecules	Prenol lipids	NA	Trimethylsilyl esters	NA
117023	0.00710688	0.0435223	0.630202	Organic compounds	Aliphatic homopolycyclic compounds	Lipids and lipid-like molecules	Steroids and steroid derivatives	Diterpenoids	Diterpenoids	NA
102673	0.800049	0.894283	-0.107283	Organic compounds	Aliphatic homopolycyclic compounds	Lipids and lipid-like molecules	Prenol lipids	Diterpenoids	Diterpenoids	URSODEOXYCHOLATE
98851	0.0425752	0.154648	-0.520431	no matches	no matches	no matches	no matches	no matches	no matches	NA
117776	0.718498	0.845374	0.0274103	Organic compounds	Aromatic heteropolycyclic compounds	Lipids and lipid-like molecules	Prenol lipids	NA	Macrolactams	NA
9322	2.09e-13	9.09e-12	-0.926784	Organic compounds	Aliphatic homomonocyclic compounds	Lipids and lipid-like molecules	Fatty Acyls	NA	Sesquiterpenoids	NA
2211	0.747938	0.864621	0.0644722	Organic compounds	Aliphatic acyclic compounds	Organoheterocyclic compounds	Carboxylic acids and derivatives	NA	Medium-chain fatty acids	NA
128006	0.253663	0.491092	0.590907	Organic compounds	Aromatic heteropolycyclic compounds	Lipids and lipid-like molecules	Prenol lipids	Terpene lactones	Triterpenoids	NA
65578	0.126022	0.320902	0.690699	no matches	no matches	no matches	no matches	no matches	no matches	NA
118969	0.127725	0.323017	-0.482496	Organic compounds	Aliphatic homopolycyclic compounds	Lipids and lipid-like molecules	Prenol lipids	Diterpenoids	Diterpenoids	NA
110120	0.0755849	0.233368	0.093943	Organic compounds	Aromatic heteropolycyclic compounds	Lipids and lipid-like molecules	Prenol lipids	Androstane steroids	Androstane steroids	NA
100270	0.0201922	0.0935153	0.636974	Organic compounds	Aliphatic acyclic compounds	Lipids and lipid-like molecules	Prenol lipids	Diterpenoids	Aconitane-type diterpenoid alkaloids	NA
36094	0.474663	0.686963	-0.0995963	Organic compounds	Aliphatic acyclic compounds	Lipids and lipid-like molecules	Fatty Acyls	NA	Medium-chain fatty acids	NA
66807	0.612304	0.770697	-0.0983509	Organic compounds	Aromatic heteropolycyclic compounds	Organoheterocyclic compounds	Azolidines	NA	Oxazolidinones	L-N2-(2-Carboxyethyl)arginine;D-Octopine
124266	0.615725	0.770697	-0.0288712	no matches	no matches	no matches	no matches	no matches	no matches	D-Octopine;L-N2-(2-Carboxyethyl)arginine
117484	0.106849	0.297191	-0.382242	no matches	no matches	no matches	no matches	no matches	no matches	NA
116539	0.293322	0.533539	0.422012	Organic compounds	Aromatic heteropolycyclic compounds	Organic acids and derivatives	Carboxylic acids and derivatives	Amino acids, peptides, and analogues	Oligopeptides	NA
82102	0.145523	0.344513	0.106402	no matches	no matches	no matches	no matches	no matches	no matches	NA
122576	0.798371	0.894283	-0.163932	Organic compounds	Aromatic heteropolycyclic compounds	Organoheterocyclic compounds	Organooxygen compounds	NA	Alkyl-phenylketones	NA
57323	0.107178	0.297191	0.651056	Organic compounds	Aromatic heteropolycyclic compounds	Organic acids and derivatives	Carboxylic acids and derivatives	NA	Fatty alcohols	NA
114256	0.000385959	0.00408565	-0.578774	Organic compounds	Aliphatic heteropolycyclic compounds	Organic acids and derivatives	Carboxylic acids and derivatives	Amino acids, peptides, and analogues	Alpha amino acid amides	NA
61374	0.100589	0.287786	-0.0271657	Organic compounds	Aromatic heteromonocyclic compounds	Organoheterocyclic compounds	Benzene and substituted derivatives	NA	1,3,5-triazine-2,4-diamines	NA
584	0.33087	0.567534	-0.188625	Organic compounds	Aromatic homomonocyclic compounds	Benzenoids	Benzene and substituted derivatives	NA	Aniline and substituted anilines	NA
70086	0.975848	0.990806	0.0360901	Organic compounds	Aromatic heteropolycyclic compounds	Lipids and lipid-like molecules	Prenol lipids	NA	Long-chain fatty acids	NA
48352	0.254493	0.491092	0.621749	Organic compounds	Aromatic homomonocyclic compounds	Benzenoids	Benzene and substituted derivatives	NA	Methoxyphenols	NA
150582	1.46e-15	9.03e-14	-2.12978	Organic compounds	Aliphatic heteropolycyclic compounds	Lipids and lipid-like molecules	Prenol lipids	Steroidal glycosides	Triterpene saponins	NA
130126	6.79e-14	3.6e-12	-1.34725	Organic compounds	Aromatic heteropolycyclic compounds	Lipids and lipid-like molecules	Steroids and steroid derivatives	NA	Triterpenoids	NA
126537	0.124987	0.320215	-0.0157966	no matches	no matches	no matches	no matches	no matches	no matches	NA
886	0.956508	0.982132	0.0284932	Organic compounds	Aromatic heteromonocyclic compounds	Organoheterocyclic compounds	Pyridines and derivatives	Aminopyridines and derivatives	Aminopyridines and derivatives	(S)-NICOTINE
111781	0.559176	0.745233	-0.552358	Organic compounds	Aliphatic homopolycyclic compounds	Lipids and lipid-like molecules	Prenol lipids	NA	Cholesterols and derivatives	NA
134291	0.0147001	0.0731059	0.812944	Organic compounds	Aromatic heteropolycyclic compounds	Lipids and lipid-like molecules	Prenol lipids	NA	Acyl carnitines	NA
121265	0.626499	0.775295	0.157116	no matches	no matches	no matches	no matches	no matches	no matches	NA
49042	0.226059	0.455405	0.342928	Organic compounds	Aromatic heteromonocyclic compounds	Organoheterocyclic compounds	Prenol lipids	NA	Alkyl-phenylketones	NA
121187	0.173395	0.382398	-0.26679	no matches	no matches	no matches	no matches	no matches	no matches	NA
87566	0.176843	0.386551	-0.222614	Organic compounds	Aromatic heteropolycyclic compounds	Organoheterocyclic compounds	Organooxygen compounds	NA	Sesquiterpenoids	NA
125359	0.976608	0.990806	-0.0570008	no matches	no matches	no matches	no matches	no matches	no matches	NA
49057	0.889634	0.943088	0.0976211	no matches	no matches	no matches	no matches	no matches	no matches	NA
85434	0.50744	0.711775	0.129688	Organic compounds	Aromatic heteromonocyclic compounds	Organoheterocyclic compounds	Prenol lipids	Pyrazoles	Phenylpyrazoles	NA
60575	0.0269149	0.113965	0.605158	Organic compounds	Aromatic heteropolycyclic compounds	Organoheterocyclic compounds	Carboxylic acids and derivatives	NA	Bicyclic monoterpenoids	NA
35114	0.202085	0.427843	0.327468	Organic compounds	Aromatic homomonocyclic compounds	Benzenoids	Benzene and substituted derivatives	NA	Methoxyphenols	NA
121330	0.280487	0.52178	0.0760334	Organic compounds	Aliphatic heteropolycyclic compounds	Lipids and lipid-like molecules	Prenol lipids	NA	Phosphatidylserines	NCGC00385123-01_C22H30O6_7b,9-Dihydroxy-3-(hydroxymethyl)-1,1,6,8-tetramethyl-5-oxo-1,1a,1b,4,4a,5,7a,7b,8,9-decahydro-9aH-cyclopropa[3,4]benzo[1,2-e]azulen-9a-yl acetate
89602	0.373498	0.602006	-0.0356848	Organic compounds	Aromatic heteropolycyclic compounds	Lipids and lipid-like molecules	Fatty Acyls	NA	Long-chain fatty acids	NA
36168	0.231779	0.465443	0.884867	no matches	no matches	no matches	no matches	no matches	no matches	NA
119312	0.0650042	0.211264	-0.733921	Organic compounds	Aromatic heteropolycyclic compounds	Organoheterocyclic compounds	Carboxylic acids and derivatives	NA	Sesquiterpenoids	NA
54057	0.144854	0.344513	0.6788	Organic compounds	Aromatic heteropolycyclic compounds	Organoheterocyclic compounds	Fatty Acyls	NA	Fatty alcohols	NA
146444	0.176562	0.386551	0.229254	no matches	no matches	no matches	no matches	no matches	no matches	NA
110997	6.33e-05	0.000901522	1.86952	Organic compounds	Aromatic heteropolycyclic compounds	Benzenoids	Benzene and substituted derivatives	Nitrobenzenes	Nitrobenzenes	NA
65355	0.0278585	0.116628	0.176628	Organic compounds	Aliphatic acyclic compounds	Lipids and lipid-like molecules	Prenol lipids	Sesquiterpenoids	Sesquiterpenoids	NA
124689	0.373428	0.602006	-0.148492	no matches	no matches	no matches	no matches	no matches	no matches	NA
90002	0.000113583	0.00146564	-1.81285	Organic compounds	Aliphatic homopolycyclic compounds	Lipids and lipid-like molecules	Prenol lipids	Diterpenoids	Diterpenoids	NA
111367	0.264956	0.508634	0.228696	no matches	no matches	no matches	no matches	no matches	no matches	NA
129775	5.07e-08	1.25e-06	-1.10876	Organic compounds	Aromatic heteropolycyclic compounds	Organoheterocyclic compounds	Prenol lipids	NA	Cytisine and derivatives	NA
82376	0.034182	0.134015	-0.719755	Organic compounds	Aromatic heteropolycyclic compounds	Lipids and lipid-like molecules	Fatty Acyls	NA	Lineolic acids and derivatives	NA
70819	0.64482	0.793707	-0.137107	Organic compounds	Aromatic heteropolycyclic compounds	Organoheterocyclic compounds	Benzene and substituted derivatives	NA	N-acyl-alpha-hexosamines	NA
80334	0.723971	0.849897	0.277801	Organic compounds	Aliphatic acyclic compounds	Lipids and lipid-like molecules	Fatty Acyls	NA	Acyl carnitines	NA
60903	0.599761	0.764927	-0.105411	Organic compounds	Aromatic heteropolycyclic compounds	Lipids and lipid-like molecules	Prenol lipids	NA	Long-chain fatty acids	NA
137986	0.00282753	0.0205412	0.533168	Organic compounds	Aromatic heteropolycyclic compounds	Lipids and lipid-like molecules	Steroids and steroid derivatives	NA	Triterpenoids	NA
89141	0.114012	0.30721	0.343303	no matches	no matches	no matches	no matches	no matches	no matches	NA
124265	0.728319	0.849897	0.0599408	no matches	no matches	no matches	no matches	no matches	no matches	NA
119030	0.0247251	0.109055	0.630272	Organic compounds	Aliphatic acyclic compounds	Lipids and lipid-like molecules	Fatty Acyls	NA	Acyl carnitines	NA
86886	0.392177	0.613087	0.0976913	Organic compounds	Aromatic heteropolycyclic compounds	Lipids and lipid-like molecules	Fatty Acyls	NA	Long-chain fatty acids	NA
109589	0.613726	0.770697	0.219473	Organic compounds	Aliphatic acyclic compounds	Lipids and lipid-like molecules	Glycerolipids	Monoradylglycerols	1-monoacylglycerols	NA
61241	0.380766	0.60612	-0.270397	Organic compounds	Aromatic heteropolycyclic compounds	Organoheterocyclic compounds	Carboxylic acids and derivatives	NA	Clavines and derivatives	NA
60898	0.66853	0.804191	-0.0837843	Organic compounds	Aromatic heteropolycyclic compounds	Lipids and lipid-like molecules	Prenol lipids	NA	Stilbenes	NA
87450	0.260157	0.500718	0.286898	Organic compounds	Aliphatic acyclic compounds	Lipids and lipid-like molecules	Fatty Acyls	Fatty acid esters	Acyl carnitines	Decanoyl-L-carnitine
94089	0.114596	0.307665	-0.525974	Organic compounds	Aliphatic acyclic compounds	Lipids and lipid-like molecules	Fatty Acyls	Fatty acid esters	Acyl carnitines	NA
14273	0.251038	0.489524	-0.112472	Organic compounds	Aliphatic acyclic compounds	Lipids and lipid-like molecules	Fatty Acyls	Fatty acids and conjugates	Medium-chain fatty acids	NA
84452	0.511018	0.711775	0.367425	Organic compounds	Aliphatic acyclic compounds	Organic acids and derivatives	Organic sulfonic acids and derivatives	Organosulfonic acids and derivatives	Trifluoromethanesulfonates	NA
124338	0.0672538	0.21762	-0.382252	no matches	no matches	no matches	no matches	no matches	no matches	NA
143665	0.783812	0.888081	0.13493	Organic compounds	Aromatic heteropolycyclic compounds	Lipids and lipid-like molecules	Steroids and steroid derivatives	NA	Triterpenoids	NA
71765	0.0526362	0.179739	0.24853	no matches	no matches	no matches	no matches	no matches	no matches	NA
74161	0.113735	0.30721	-0.353946	Organic compounds	Aromatic heteropolycyclic compounds	Organoheterocyclic compounds	Organooxygen compounds	NA	Sesquiterpenoids	NA
147612	0.143877	0.344513	-0.135006	Organic compounds	Aliphatic heteropolycyclic compounds	Lipids and lipid-like molecules	Prenol lipids	Triterpenoids	Triterpenoids	NA
52747	0.29377	0.533539	0.814018	Organic compounds	Aromatic heteropolycyclic compounds	Organoheterocyclic compounds	Carboxylic acids and derivatives	NA	Tetralins	NA
86877	0.00972092	0.0545697	-0.939027	no matches	no matches	no matches	no matches	no matches	no matches	NA
69427	0.867227	0.931326	0.192681	no matches	no matches	no matches	no matches	no matches	no matches	NA
57003	0.0796077	0.244769	1.04308	no matches	no matches	no matches	no matches	no matches	no matches	NA
116479	0.0977137	0.282835	0.553594	Organic compounds	Aliphatic homopolycyclic compounds	Lipids and lipid-like molecules	Prenol lipids	NA	Cholesterols and derivatives	NA
82383	0.590946	0.762633	0.393197	Organic compounds	Aromatic heteropolycyclic compounds	Organoheterocyclic compounds	Fatty Acyls	NA	Lineolic acids and derivatives	NA
65631	0.0927315	0.273761	-0.688794	Organic compounds	Aromatic heteropolycyclic compounds	Organoheterocyclic compounds	Benzene and substituted derivatives	NA	Benzimidazoles	NA
116241	2.64e-17	1.95e-15	4.97641	Organic compounds	Aliphatic heteropolycyclic compounds	Lipids and lipid-like molecules	Steroids and steroid derivatives	Steroidal alkaloids	Acyl carnitines	NA
3944	0.718734	0.845374	-0.178075	no matches	no matches	no matches	no matches	no matches	no matches	NA
88043	0.586683	0.761051	0.23289	Organic compounds	Aliphatic homopolycyclic compounds	Lipids and lipid-like molecules	Prenol lipids	NA	Diterpenoids	NA
89375	0.930242	0.96138	-0.0253377	no matches	no matches	no matches	no matches	no matches	no matches	NA
123930	0.00304131	0.0218797	0.658316	no matches	no matches	no matches	no matches	no matches	no matches	NA
100313	0.119535	0.312347	0.546608	no matches	no matches	no matches	no matches	no matches	no matches	NA
65536	0.42123	0.637227	-0.404207	Organic compounds	Aromatic heteropolycyclic compounds	Organoheterocyclic compounds	Benzene and substituted derivatives	NA	Benzimidazoles	NA
97725	0.439995	0.650787	-0.661525	no matches	no matches	no matches	no matches	no matches	no matches	NA
124972	0.0327269	0.129708	-0.446562	no matches	no matches	no matches	no matches	no matches	no matches	NA
14275	0.131424	0.32845	-0.0777757	Organic compounds	Aliphatic acyclic compounds	Lipids and lipid-like molecules	Fatty Acyls	Fatty acids and conjugates	Medium-chain fatty acids	NA
129744	0.000111546	0.00146564	0.275237	no matches	no matches	no matches	no matches	no matches	no matches	NA
79166	0.398644	0.620578	-0.325267	Organic compounds	Aromatic heteromonocyclic compounds	Organoheterocyclic compounds	Benzene and substituted derivatives	NA	Coumarins and derivatives	NA
122213	0.0215778	0.097933	-0.533945	Organic compounds	Aliphatic homopolycyclic compounds	Lipids and lipid-like molecules	Prenol lipids	NA	Triterpenoids	NA
2223	0.923343	0.956919	0.0630548	Organic compounds	Aliphatic acyclic compounds	Organoheterocyclic compounds	Carboxylic acids and derivatives	NA	Medium-chain fatty acids	NA
135076	0.0109748	0.0589299	-1.19005	Organic compounds	Aromatic heteropolycyclic compounds	Lipids and lipid-like molecules	Steroids and steroid derivatives	NA	Triterpenoids	NA
125505	0.434237	0.647433	0.109809	Organic compounds	Aromatic heteropolycyclic compounds	Lipids and lipid-like molecules	Prenol lipids	Sesquiterpenoids	Eudesmane, isoeudesmane or cycloeudesmane sesquiterpenoids	taurohyodeoxycholic acid
125459	0.80248	0.894283	0.0276186	Organic compounds	Aromatic heteropolycyclic compounds	Lipids and lipid-like molecules	Prenol lipids	NA	Eudesmane, isoeudesmane or cycloeudesmane sesquiterpenoids	Phenylacetic acid
145972	0.659951	0.804191	0.189843	no matches	no matches	no matches	no matches	no matches	no matches	Estradiol-17beta;Estradiol-17alpha
131402	0.850636	0.924388	0.193717	Organic compounds	Aromatic heteropolycyclic compounds	Lipids and lipid-like molecules	Prenol lipids	Sesquiterpenoids	Eudesmane, isoeudesmane or cycloeudesmane sesquiterpenoids	Spectral Match to Tauroursodeoxycholic acid from NIST14
75148	0.0331103	0.130504	0.534061	Organic compounds	Aliphatic homopolycyclic compounds	Lipids and lipid-like molecules	Prenol lipids	Sesquiterpenoids	Sesquiterpenoids	NA
120657	0.0915046	0.27122	-0.467892	no matches	no matches	no matches	no matches	no matches	no matches	NA
121340	0.143201	0.344513	0.337342	no matches	no matches	no matches	no matches	no matches	no matches	NA
14269	0.850787	0.924388	0.106102	Organic compounds	Aliphatic acyclic compounds	Lipids and lipid-like molecules	Fatty Acyls	Fatty acids and conjugates	Medium-chain fatty acids	N2-Succinyl-L-arginine
135823	0.363015	0.597765	-0.25183	Organic compounds	Aromatic heteropolycyclic compounds	Lipids and lipid-like molecules	Prenol lipids	1-benzopyrans	2,2-dimethyl-1-benzopyrans	N2-Succinyl-L-arginine
129992	0.138016	0.339393	0.00636901	Organic compounds	Aromatic heteropolycyclic compounds	Organic acids and derivatives	Carboxylic acids and derivatives	Amino acids, peptides, and analogues	Hybrid peptides	NA
113480	0.869467	0.932381	0.0362131	no matches	no matches	no matches	no matches	no matches	no matches	NA
86873	1.59e-06	3.46e-05	-1.05244	Organic compounds	Aliphatic acyclic compounds	Lipids and lipid-like molecules	Prenol lipids	Sesquiterpenoids	Sesquiterpenoids	NA
126610	3.68e-10	1.18e-08	-2.11234	no matches	no matches	no matches	no matches	no matches	no matches	NA
143560	0.0284266	0.118338	-0.0402701	no matches	no matches	no matches	no matches	no matches	no matches	NA
25736	0.979295	0.990806	0.0415026	Organic compounds	Aliphatic heteromonocyclic compounds	Lipids and lipid-like molecules	Fatty Acyls	NA	Lupinine-type alkaloids	NA
111866	0.92668	0.959036	-0.0295754	Organic compounds	Aliphatic acyclic compounds	Lipids and lipid-like molecules	Prenol lipids	Triterpenoids	Triterpenoids	NA
113476	0.000228173	0.00272704	1.02625	no matches	no matches	no matches	no matches	no matches	no matches	NA
113317	0.378029	0.603705	0.358805	Organic compounds	Aromatic heteropolycyclic compounds	Organoheterocyclic compounds	Carboxylic acids and derivatives	Amino acids, peptides, and analogues	Delta amino acids and derivatives	NA
52158	0.856305	0.92757	-0.159156	no matches	no matches	no matches	no matches	no matches	no matches	NA
124072	1.02e-11	3.61e-10	-1.47378	no matches	no matches	no matches	no matches	no matches	no matches	NA
57125	0.00467975	0.0312405	0.394916	Organic compounds	Aromatic heteropolycyclic compounds	Organoheterocyclic compounds	Prenol lipids	Pyrazoles	Pyrazoles	NA
121315	0.0252049	0.109948	0.527194	Organic compounds	Aliphatic homopolycyclic compounds	Lipids and lipid-like molecules	Steroids and steroid derivatives	Cholestane steroids	Cholesterols and derivatives	NA
112407	0.00183381	0.0146113	0.962389	no matches	no matches	no matches	no matches	no matches	no matches	NA
116808	0.0124901	0.0647216	0.660957	Organic compounds	Aliphatic homopolycyclic compounds	Lipids and lipid-like molecules	Steroids and steroid derivatives	Diterpenoids	Diterpenoids	NA
54065	0.162136	0.365175	0.455414	Organic compounds	Aromatic heteropolycyclic compounds	Organoheterocyclic compounds	Carboxylic acids and derivatives	NA	Shiff bases	NA
75104	0.798966	0.894283	-0.123943	no matches	no matches	no matches	no matches	no matches	no matches	NA
99847	0.267161	0.508875	-0.284386	Organic compounds	Aromatic homomonocyclic compounds	Benzenoids	Benzene and substituted derivatives	Benzoyl derivatives	Benzoyl derivatives	NA
137098	0.161171	0.36411	-0.261946	Organic compounds	Aromatic heteropolycyclic compounds	Benzenoids	Steroids and steroid derivatives	NA	Macrolactams	NA
118817	6.83e-05	0.000955079	0.94448	no matches	no matches	no matches	no matches	no matches	no matches	NA
8357	0.846359	0.923641	0.0323182	Organic compounds	Aromatic homomonocyclic compounds	Lipids and lipid-like molecules	Benzene and substituted derivatives	NA	Phenylpropanes	NA
85112	0.992404	0.993891	-0.023637	no matches	no matches	no matches	no matches	no matches	no matches	NA
113635	0.0221303	0.0993851	-0.434584	Organic compounds	Aromatic heteropolycyclic compounds	Lipids and lipid-like molecules	Prenol lipids	NA	Steroidal saponins	Massbank:PR101056 1-O-b-D-glucopyranosyl sinapate|1-O-Sinapoyl-beta-D-glucose|1-O-Sinapoyl beta-D-glucoside
97400	0.0822	0.249632	-0.453423	Organic compounds	Aromatic heteropolycyclic compounds	Lipids and lipid-like molecules	Prenol lipids	NA	Piperidinones	NA
113477	0.00939639	0.0535594	1.02578	no matches	no matches	no matches	no matches	no matches	no matches	NA
126795	0.425815	0.63878	0.208877	no matches	no matches	no matches	no matches	no matches	no matches	NA
130737	0.745046	0.862624	0.541306	Organic compounds	Aromatic heteropolycyclic compounds	Lipids and lipid-like molecules	Prenol lipids	NA	Triterpenoids	NA
3105	0.859759	0.92757	0.158093	Organic compounds	Aromatic heteropolycyclic compounds	Organoheterocyclic compounds	Benzene and substituted derivatives	NA	Benzoic acids	NA
54291	0.553049	0.741911	-0.27123	no matches	no matches	no matches	no matches	no matches	no matches	NA
104172	0.336519	0.573243	0.272926	Organic compounds	Aliphatic homopolycyclic compounds	Lipids and lipid-like molecules	Prenol lipids	Diterpenoids	Fatty alcohols	NA
102593	0.347748	0.586974	-0.424155	Organic compounds	Aromatic heteropolycyclic compounds	Organoheterocyclic compounds	Prenol lipids	NA	Eremophilane, 8,9-secoeremophilane and furoeremophilane sesquiterpenoids	NA
116270	0.12919	0.324606	0.301502	Organic compounds	Aromatic heteropolycyclic compounds	Organic acids and derivatives	Carboxylic acids and derivatives	Amino acids, peptides, and analogues	Alpha amino acid amides	NA
117630	0.0730774	0.227522	0.105196	no matches	no matches	no matches	no matches	no matches	no matches	Estrone
114208	0.222846	0.452407	0.216558	Organic compounds	Aliphatic acyclic compounds	Lipids and lipid-like molecules	Fatty Acyls	Fatty acid esters	Acyl carnitines	NA
96979	0.214635	0.444258	-0.424871	Organic compounds	Aromatic heteropolycyclic compounds	Organoheterocyclic compounds	Organooxygen compounds	NA	Sesquiterpenoids	NA
66805	0.0010623	0.00933566	-0.549966	no matches	no matches	no matches	no matches	no matches	no matches	NA
124973	0.669488	0.804191	-0.31993	Organic compounds	Aromatic heteropolycyclic compounds	Lipids and lipid-like molecules	Prenol lipids	NA	Aromatic monoterpenoids	NA
41957	0.0530964	0.180114	0.697888	no matches	no matches	no matches	no matches	no matches	no matches	NA
88394	0.212119	0.443016	0.291326	Organic compounds	Aliphatic homopolycyclic compounds	Lipids and lipid-like molecules	Prenol lipids	Diterpenoids	Kaurane diterpenoids	NA
37292	0.537595	0.73595	0.356168	Organic compounds	Aromatic homomonocyclic compounds	Organoheterocyclic compounds	Carboxylic acids and derivatives	NA	Terpene lactones	NA
117184	0.19522	0.415684	0.583125	no matches	no matches	no matches	no matches	no matches	no matches	NA
122050	0.121287	0.314244	0.340328	Organic compounds	Aromatic heteropolycyclic compounds	Lipids and lipid-like molecules	Benzene and substituted derivatives	NA	Sesquiterpenoids	NA
81090	0.302107	0.543353	0.533541	no matches	no matches	no matches	no matches	no matches	no matches	NA
116264	2.53e-06	5.06e-05	0.696354	no matches	no matches	no matches	no matches	no matches	no matches	NA
97987	0.122157	0.315395	0.630053	no matches	no matches	no matches	no matches	no matches	no matches	NA
88901	0.489262	0.698542	0.101402	Organic compounds	Aromatic heteropolycyclic compounds	Lipids and lipid-like molecules	Prenol lipids	Amino acids, peptides, and analogues	Butenolides	Spectral Match to .alpha.-Linolenoyl ethanolamide from NIST14
7357	0.266807	0.508875	0.0764404	Organic compounds	Aromatic heteropolycyclic compounds	Organoheterocyclic compounds	Dihydrofurans	NA	Butenolides	NA
70094	0.376835	0.603569	0.143569	Organic compounds	Aromatic heteropolycyclic compounds	Lipids and lipid-like molecules	Prenol lipids	NA	Long-chain fatty acids	NA
106911	0.958623	0.982132	0.0336842	no matches	no matches	no matches	no matches	no matches	no matches	NA
55401	0.0408217	0.149747	-0.7615	no matches	no matches	no matches	no matches	no matches	no matches	NA
145304	0.353596	0.590122	-0.264665	Organic compounds	Aromatic heteropolycyclic compounds	Lipids and lipid-like molecules	Steroids and steroid derivatives	NA	Triterpenoids	NA
103753	0.763072	0.871243	0.069539	Organic compounds	Aliphatic heteromonocyclic compounds	Lipids and lipid-like molecules	Fatty Acyls	Fatty acids and conjugates	Long-chain fatty acids	NA
124301	0.0105581	0.0579524	-0.369677	no matches	no matches	no matches	no matches	no matches	no matches	NA
124541	0.0894767	0.266274	0.73316	no matches	no matches	no matches	no matches	no matches	no matches	Androsta-1,4-diene-3,17-dione
131396	0.447312	0.656698	-0.476839	Organic compounds	Aromatic heteropolycyclic compounds	Lipids and lipid-like molecules	Prenol lipids	NA	Acyl carnitines	Spectral Match to Tauroursodeoxycholic acid from NIST14
129882	1.76e-06	3.72e-05	-0.938106	no matches	no matches	no matches	no matches	no matches	no matches	NA
60859	0.498931	0.708923	-0.285031	no matches	no matches	no matches	no matches	no matches	no matches	NA
20812	0.309357	0.54972	0.929756	no matches	no matches	no matches	no matches	no matches	no matches	NA
41934	0.475856	0.687348	0.266026	Organic compounds	Aromatic heteropolycyclic compounds	Organoheterocyclic compounds	Carboxylic acids and derivatives	NA	Shiff bases	Spectral Match to 1,11-Undecanedicarboxylic acid from NIST14
109614	0.913429	0.953311	0.0112987	no matches	no matches	no matches	no matches	no matches	no matches	NA
97951	0.00966787	0.0545697	1.27897	Organic compounds	Aliphatic acyclic compounds	Lipids and lipid-like molecules	Fatty Acyls	Fatty acid esters	Acyl carnitines	NA
121838	0.223844	0.453192	-0.340712	no matches	no matches	no matches	no matches	no matches	no matches	NA
13931	0.107486	0.297191	1.13322	Organic compounds	Aromatic heteropolycyclic compounds	Organoheterocyclic compounds	Carboxylic acids and derivatives	NA	Tetralins	NA
94621	3.31e-12	1.23e-10	0.993919	no matches	no matches	no matches	no matches	no matches	no matches	NA
125143	0.155248	0.357623	0.465303	Organic compounds	Aromatic homomonocyclic compounds	Lipids and lipid-like molecules	Prenol lipids	Sesquiterpenoids	Long-chain fatty acids	NA
62751	0.00771649	0.0457433	0.0987942	Organic compounds	Aromatic heteropolycyclic compounds	Organoheterocyclic compounds	Carboxylic acids and derivatives	Amino acids, peptides, and analogues	Diphenylmethanes	NA
52279	0.874815	0.934061	0.26557	no matches	no matches	no matches	no matches	no matches	no matches	L-Alanyl-gamma-D-glutamyl-L-lysine
44952	0.582259	0.759602	-0.587715	Organic compounds	Aliphatic acyclic compounds	Lipids and lipid-like molecules	Fatty Acyls	Fatty acids and conjugates	Long-chain fatty acids	11-Deoxycortisol;11beta,17alpha,21-Trihydroxypregnenolone
100402	0.186749	0.402271	-0.0395866	no matches	no matches	no matches	no matches	no matches	no matches	NA
101102	0.595904	0.762633	-0.122507	Organic compounds	Aliphatic homopolycyclic compounds	Lipids and lipid-like molecules	Prenol lipids	Diterpenoids	Diterpenoids	NA
98850	0.776486	0.882479	0.0966149	Organic compounds	Aliphatic heteromonocyclic compounds	Lipids and lipid-like molecules	Pyrrolidines	NA	Pyrrolidines	NA
134927	0.836425	0.916851	0.114948	Organic compounds	Aromatic heteropolycyclic compounds	Lipids and lipid-like molecules	Steroids and steroid derivatives	NA	Triterpenoids	Spectral Match to Lyso-PAF C-18 from NIST14
147803	0.0716657	0.227071	-0.242367	Organic compounds	Aromatic heteropolycyclic compounds	Lipids and lipid-like molecules	Steroids and steroid derivatives	NA	Triterpenoids	NA
85427	0.127148	0.322659	0.436977	Organic compounds	Aromatic homopolycyclic compounds	Lipids and lipid-like molecules	Prenol lipids	Diterpenoids	Diterpenoids	NA
120736	0.00384131	0.026602	-0.517174	Organic compounds	Aromatic heteropolycyclic compounds	Lipids and lipid-like molecules	Prenol lipids	Amino acids, peptides, and analogues	Aromatic monoterpenoids	NA
88241	0.0045927	0.0309381	-0.664256	no matches	no matches	no matches	no matches	no matches	no matches	NA
94611	0.245456	0.481172	-0.446673	Organic compounds	Aromatic heteropolycyclic compounds	Organoheterocyclic compounds	Fatty Acyls	Amino acids, peptides, and analogues	Acyl carnitines	NA
75496	0.0081978	0.0482109	-0.56629	Organic compounds	Aliphatic acyclic compounds	Lipids and lipid-like molecules	Fatty Acyls	Fatty acids and conjugates	Long-chain fatty acids	NA
117805	0.0316456	0.126753	0.392945	no matches	no matches	no matches	no matches	no matches	no matches	NA
101160	0.430896	0.645038	-0.318823	no matches	no matches	no matches	no matches	no matches	no matches	NA
121943	0.168144	0.373549	-0.72071	no matches	no matches	no matches	no matches	no matches	no matches	NA
106919	0.00382814	0.026602	0.630683	Organic compounds	Aliphatic acyclic compounds	Lipids and lipid-like molecules	Fatty Acyls	NA	Acyl carnitines	NA
120163	0.000118723	0.00149108	-0.609906	no matches	no matches	no matches	no matches	no matches	no matches	NA
114063	0.0472799	0.16604	-0.708786	no matches	no matches	no matches	no matches	no matches	no matches	NA
130442	0.000463591	0.00477112	-1.42486	no matches	no matches	no matches	no matches	no matches	no matches	NA
86143	0.0146808	0.0731059	0.1731	no matches	no matches	no matches	no matches	no matches	no matches	NA
54536	0.188299	0.404434	0.199042	Organic compounds	Aliphatic acyclic compounds	Lipids and lipid-like molecules	Prenol lipids	NA	Triterpenoids	NA
119686	0.0183969	0.086592	-0.474985	no matches	no matches	no matches	no matches	no matches	no matches	NA
113060	0.987551	0.992911	0.0213746	no matches	no matches	no matches	no matches	no matches	no matches	NA
140117	0.0720001	0.227071	-0.458176	no matches	no matches	no matches	no matches	no matches	no matches	NA
89605	2.52e-05	0.00040625	1.14425	Organic compounds	Aliphatic heteromonocyclic compounds	Lipids and lipid-like molecules	Fatty Acyls	1,2-dioxanes	1,2-dioxanes	NA
119059	0.908531	0.952584	0.0719781	no matches	no matches	no matches	no matches	no matches	no matches	NA
85855	0.0552475	0.186084	0.295039	Organic compounds	Aromatic heteropolycyclic compounds	Lipids and lipid-like molecules	Prenol lipids	NA	Diterpenoids	NA
113911	0.107155	0.297191	-0.528178	Organic compounds	Aliphatic heteropolycyclic compounds	Lipids and lipid-like molecules	Prenol lipids	NA	Acyclic monoterpenoids	NA
61148	0.971488	0.990196	-0.0505256	no matches	no matches	no matches	no matches	no matches	no matches	NA
119379	0.142494	0.344513	-0.443178	Organic compounds	Aliphatic heteropolycyclic compounds	Lipids and lipid-like molecules	Prenol lipids	NA	Phosphatidylserines	DEOXYCHOLATE
59916	0.353586	0.590122	0.63609	no matches	no matches	no matches	no matches	no matches	no matches	NA
106140	0.414148	0.631449	0.266373	Organic compounds	Aromatic heteropolycyclic compounds	Lipids and lipid-like molecules	Steroids and steroid derivatives	NA	Steroid esters	NA
130382	0.726325	0.849897	0.00519878	Organic compounds	Aromatic heteropolycyclic compounds	Lipids and lipid-like molecules	Prenol lipids	Terpene glycosides	Diterpene glycosides	NA
146493	0.416725	0.634073	0.17884	Organic compounds	Aromatic heteropolycyclic compounds	Lipids and lipid-like molecules	Steroids and steroid derivatives	NA	Triterpenoids	NA
87118	0.617939	0.770863	-0.289563	no matches	no matches	no matches	no matches	no matches	no matches	NA
116278	0.814284	0.90192	0.220357	Organic compounds	Aliphatic homopolycyclic compounds	Lipids and lipid-like molecules	Prenol lipids	NA	Diterpenoids	NA
973	0.916758	0.95544	-0.0126248	no matches	no matches	no matches	no matches	no matches	no matches	Spectral Match to .alpha.-CMBHC from NIST14
106437	0.251723	0.489571	0.507619	no matches	no matches	no matches	no matches	no matches	no matches	NA
35136	0.0532321	0.180114	-0.17773	Organic compounds	Aliphatic acyclic compounds	Organic acids and derivatives	Carboxylic acids and derivatives	NA	Menthane monoterpenoids	MassbankEU:SM808701 Diphenylsulfone|Diphenyl sulfone|Benzenesulfonylbenzene
106143	5.94e-07	1.38e-05	0.830228	Organic compounds	Aromatic heteropolycyclic compounds	Lipids and lipid-like molecules	Prenol lipids	NA	Aspidospermatan-type alkaloids	NA
80122	2.27e-05	0.000374166	1.40601	Organic compounds	Aromatic heteropolycyclic compounds	Benzenoids	Benzene and substituted derivatives	Amino acids, peptides, and analogues	Diphenylmethanes	NA
142939	0.0804273	0.245254	-0.426102	Organic compounds	Aliphatic heteropolycyclic compounds	Organic acids and derivatives	Peptidomimetics	Depsipeptides	Cyclic depsipeptides	NA
111794	0.829703	0.913536	-0.293175	Organic compounds	Aromatic heteropolycyclic compounds	Organoheterocyclic compounds	Benzene and substituted derivatives	NA	Sesquiterpenoids	NA
121710	0.00861197	0.0502478	-0.771281	no matches	no matches	no matches	no matches	no matches	no matches	NA
100023	0.0327334	0.129708	-0.829639	no matches	no matches	no matches	no matches	no matches	no matches	NA
121480	6.74e-06	0.000121829	-0.561444	Organic compounds	Aromatic heteropolycyclic compounds	Lipids and lipid-like molecules	Carboxylic acids and derivatives	NA	Delta amino acids and derivatives	NA
4849	0.980938	0.990806	-0.0699054	Organic compounds	Aliphatic acyclic compounds	Lipids and lipid-like molecules	Fatty Acyls	NA	Stilbenes	NA
89376	0.785948	0.889141	0.033404	Organic compounds	Aromatic heteropolycyclic compounds	Lipids and lipid-like molecules	Prenol lipids	NA	Long-chain fatty acids	NA
75140	0.027227	0.114632	-0.673102	Organic compounds	Aromatic heteropolycyclic compounds	Alkaloids and derivatives	Plumeran-type alkaloids	NA	Plumeran-type alkaloids	NA
120278	0.9591	0.982132	0.0180885	Organic compounds	Aliphatic acyclic compounds	Lipids and lipid-like molecules	Prenol lipids	Triterpenoids	Triterpenoids	NA
97728	0.0257191	0.110502	0.51092	Organic compounds	Aliphatic acyclic compounds	Lipids and lipid-like molecules	Fatty Acyls	Fatty acid esters	Acyl carnitines	NA
79661	0.483534	0.693034	-0.078952	no matches	no matches	no matches	no matches	no matches	no matches	NA
102619	0.89696	0.946791	0.119505	no matches	no matches	no matches	no matches	no matches	no matches	NA
61382	0.000109285	0.00146564	1.26608	Organic compounds	Aromatic heteromonocyclic compounds	Organoheterocyclic compounds	Benzene and substituted derivatives	NA	1,3,5-triazine-2,4-diamines	NA
117804	0.00207493	0.015689	0.616801	no matches	no matches	no matches	no matches	no matches	no matches	NA
147630	0.00659509	0.0414149	0.513877	Organic compounds	Aromatic heteropolycyclic compounds	Lipids and lipid-like molecules	Steroids and steroid derivatives	NA	Triterpenoids	NA
125291	0.573053	0.757315	0.225567	Organic compounds	Aromatic heteropolycyclic compounds	Lipids and lipid-like molecules	Prenol lipids	Diterpenoids	Diterpenoids	taurocholic acid
60155	0.281662	0.52178	-0.683001	Organic compounds	Aliphatic acyclic compounds	Benzenoids	Phenanthrenes and derivatives	NA	Benzene and substituted derivatives	NA
97401	0.333976	0.570222	1.2254	Organic compounds	Aliphatic heteropolycyclic compounds	Lipids and lipid-like molecules	Prenol lipids	NA	Quinuclidines	NA
121594	0.0716636	0.227071	0.758331	Organic compounds	Aliphatic heteropolycyclic compounds	Lipids and lipid-like molecules	Prenol lipids	Triterpenoids	Triterpenoids	NA
148887	0.865856	0.931204	-0.0661154	Organic compounds	Aliphatic heteropolycyclic compounds	Lipids and lipid-like molecules	Prenol lipids	Triterpenoids	Triterpenoids	NA
120967	0.99255	0.993891	-0.0270714	Organic compounds	Aromatic heteropolycyclic compounds	Lipids and lipid-like molecules	Prenol lipids	Amino acids, peptides, and analogues	Eudesmanolides, secoeudesmanolides, and derivatives	NA
130448	0.406402	0.625729	-0.0283207	Organic compounds	Aromatic heteropolycyclic compounds	Lipids and lipid-like molecules	Prenol lipids	NA	Triterpenoids	PC(0:0/16:0); [M+H]+ C24H51N1O7P1
146494	0.0723196	0.227071	1.59225	Organic compounds	Aromatic heteropolycyclic compounds	Lipids and lipid-like molecules	Steroids and steroid derivatives	NA	Triterpenoids	NA
93947	0.448281	0.656698	-0.0259391	no matches	no matches	no matches	no matches	no matches	no matches	NA
113179	0.9596	0.982132	0.0525849	Organic compounds	Aromatic heteromonocyclic compounds	Organic acids and derivatives	Carboxylic acids and derivatives	Amino acids, peptides, and analogues	Dipeptides	NA
124572	0.00129483	0.010903	0.978738	Organic compounds	Aromatic heteropolycyclic compounds	Lipids and lipid-like molecules	Steroids and steroid derivatives	NA	Triterpenoids	NA
70842	0.000580815	0.005816	-0.94918	no matches	no matches	no matches	no matches	no matches	no matches	NA
113325	0.0314796	0.126753	0.307643	Organic compounds	Aromatic heteropolycyclic compounds	Lipids and lipid-like molecules	Prenol lipids	NA	Stilbenes	NA
98853	0.530555	0.72939	0.165477	Organic compounds	Aliphatic heteromonocyclic compounds	Lipids and lipid-like molecules	Fatty Acyls	Fatty acids and conjugates	Long-chain fatty acids	NA
87044	0.0311165	0.125996	-0.484377	no matches	no matches	no matches	no matches	no matches	no matches	NA
128043	0.233915	0.467199	-0.340722	no matches	no matches	no matches	no matches	no matches	no matches	NA
80672	0.1866	0.402271	-0.47882	Organic compounds	Aromatic homomonocyclic compounds	Benzenoids	Benzene and substituted derivatives	Nitrobenzenes	Nitrobenzenes	NA
113920	0.96696	0.9883	0.0436566	no matches	no matches	no matches	no matches	no matches	no matches	NA
115824	0.4105	0.628472	-0.4416	Organic compounds	Aromatic heteropolycyclic compounds	Lipids and lipid-like molecules	Organooxygen compounds	NA	Alkyl-phenylketones	NA
112048	0.348656	0.587168	0.2468	Organic compounds	Aromatic heteropolycyclic compounds	Lipids and lipid-like molecules	Prenol lipids	NA	Sesquiterpenoids	NA
82093	0.701919	0.832195	-0.224926	Organic compounds	Aromatic heteropolycyclic compounds	Organoheterocyclic compounds	Organooxygen compounds	NA	Sesquiterpenoids	NA
85859	0.00060446	0.00597207	0.419166	Organic compounds	Aliphatic acyclic compounds	Lipids and lipid-like molecules	Fatty Acyls	Fatty acid esters	Acyl carnitines	NA
125047	0.504512	0.711775	0.0635138	Organic compounds	Aliphatic homopolycyclic compounds	Lipids and lipid-like molecules	Steroids and steroid derivatives	Cholestane steroids	Cholesterols and derivatives	NA
25661	2.85e-12	1.11e-10	-1.27669	Organic compounds	Aliphatic homomonocyclic compounds	Lipids and lipid-like molecules	Fatty Acyls	NA	Sesquiterpenoids	NA
36003	0.0402144	0.148253	-0.585715	Organic compounds	Aromatic homomonocyclic compounds	Benzenoids	Benzene and substituted derivatives	NA	Methoxyphenols	NA
82963	0.22056	0.448997	0.0549146	Organic compounds	Aromatic heteropolycyclic compounds	Organoheterocyclic compounds	Benzene and substituted derivatives	NA	Iridoids and derivatives	NA
60488	0.135903	0.336804	0.573619	Inorganic compounds	NA	Mixed metal/non-metal compounds	Metalloid salts	Metalloid fluorides	Metalloid fluorides	NA
89592	0.0121457	0.0642589	0.589754	Organic compounds	Aliphatic acyclic compounds	Lipids and lipid-like molecules	Fatty Acyls	Fatty acid esters	Acyl carnitines	NA
77581	0.0373943	0.143571	0.079239	Organic compounds	Aliphatic acyclic compounds	Lipids and lipid-like molecules	Fatty Acyls	Fatty acid esters	Acyl carnitines	NA
135014	0.326701	0.564603	-0.544957	no matches	no matches	no matches	no matches	no matches	no matches	NA
134866	3.38e-06	6.6e-05	-0.873274	no matches	no matches	no matches	no matches	no matches	no matches	NA
83485	0.0102481	0.0570964	0.881663	no matches	no matches	no matches	no matches	no matches	no matches	NA
130061	1.19e-09	3.39e-08	-2.05056	Organic compounds	Aromatic heteropolycyclic compounds	Organic acids and derivatives	Peptidomimetics	Depsipeptides	Cyclic depsipeptides	NA
100271	0.73721	0.856226	-0.150348	no matches	no matches	no matches	no matches	no matches	no matches	NA
110247	0.0599287	0.199135	-0.0646562	Organic compounds	Aliphatic heteropolycyclic compounds	Lipids and lipid-like molecules	Prenol lipids	NA	Diterpene lactones	NA
60496	0.805372	0.894724	0.180283	no matches	no matches	no matches	no matches	no matches	no matches	NA
105005	1.43e-16	9.6e-15	2.53792	Organic compounds	Aliphatic acyclic compounds	Lipids and lipid-like molecules	Prenol lipids	Diterpenoids	Aconitane-type diterpenoid alkaloids	NA
117420	0.269202	0.508875	-0.241328	Organic compounds	Aromatic heteropolycyclic compounds	Organoheterocyclic compounds	Carboxylic acids and derivatives	NA	Alpha amino acid amides	NA
36108	0.391206	0.612862	0.34101	Organic compounds	Aliphatic acyclic compounds	Lipids and lipid-like molecules	Fatty Acyls	NA	Medium-chain fatty acids	NA
104577	0.45203	0.65958	-0.287369	no matches	no matches	no matches	no matches	no matches	no matches	NA
83483	0.0156991	0.0775535	0.807159	Organic compounds	Aliphatic acyclic compounds	Lipids and lipid-like molecules	Fatty Acyls	Fatty acid esters	Acyl carnitines	NA
83643	0.00069387	0.00676523	0.621814	no matches	no matches	no matches	no matches	no matches	no matches	NA
124074	0.000204605	0.00248545	1.00217	Organic compounds	Aromatic heteromonocyclic compounds	Organic acids and derivatives	Peptidomimetics	Hybrid peptides	Hybrid peptides	NA
5447	0.482224	0.692497	-0.13536	Organic compounds	Aliphatic acyclic compounds	Organic oxygen compounds	Organooxygen compounds	Alcohols and polyols	Secondary alcohols	NA
125213	0.000243124	0.0028585	-0.68961	no matches	no matches	no matches	no matches	no matches	no matches	17alpha-Hydroxypregnenolone;17alpha,20alpha-Dihydroxypregn-4-en-3-one
88232	0.0060199	0.0381261	1.05151	no matches	no matches	no matches	no matches	no matches	no matches	17alpha-Hydroxypregnenolone
120649	0.21989	0.448867	0.453734	no matches	no matches	no matches	no matches	no matches	no matches	17alpha,21-Dihydroxypregnenolone
80689	0.0268717	0.113965	-0.772531	Organic compounds	Aromatic heteropolycyclic compounds	Organoheterocyclic compounds	Piperidines	NA	Aspidospermatan-type alkaloids	NA
70708	0.969031	0.989052	0.0640221	no matches	no matches	no matches	no matches	no matches	no matches	17alpha-Hydroxyprogesterone
110401	0.0507637	0.175775	-0.143649	Organic compounds	Aliphatic heteropolycyclic compounds	Lipids and lipid-like molecules	Pyrrolidines	NA	N-alkylpyrrolidines	NA
8052	0.15806	0.361489	0.575513	no matches	no matches	no matches	no matches	no matches	no matches	NA
127006	0.324443	0.563026	-0.300046	Organic compounds	Aromatic heteropolycyclic compounds	Lipids and lipid-like molecules	Prenol lipids	Triterpenoids	Triterpenoids	NA
47705	0.110313	0.301631	1.02171	no matches	no matches	no matches	no matches	no matches	no matches	NA
16022	0.311524	0.551373	0.716997	Organic compounds	Aromatic heteropolycyclic compounds	Organoheterocyclic compounds	Carboxylic acids and derivatives	NA	Tetralins	NA
116951	0.000255248	0.00290983	0.602016	no matches	no matches	no matches	no matches	no matches	no matches	NA
121938	0.306952	0.549399	0.379903	Organic compounds	Aromatic heteropolycyclic compounds	Organic acids and derivatives	Carboxylic acids and derivatives	Amino acids, peptides, and analogues	Alpha amino acid amides	NA
116502	0.297313	0.536032	-0.165568	Organic compounds	Aromatic heteromonocyclic compounds	Lipids and lipid-like molecules	Prenol lipids	Amino acids, peptides, and analogues	Eudesmanolides, secoeudesmanolides, and derivatives	NA
114618	0.873393	0.933887	0.04465	no matches	no matches	no matches	no matches	no matches	no matches	NA
145327	0.182494	0.396563	0.487442	Organic compounds	Aromatic heteropolycyclic compounds	Lipids and lipid-like molecules	Steroids and steroid derivatives	NA	Macrolactams	NA
52174	0.544337	0.738211	-0.234013	Organic compounds	Aliphatic heteropolycyclic compounds	Organoheterocyclic compounds	Organooxygen compounds	NA	Cyclohexenones	NA
82774	3.43e-05	0.000541288	-0.983503	no matches	no matches	no matches	no matches	no matches	no matches	Pyrimidifen
120104	5.38e-05	0.000781192	1.35539	no matches	no matches	no matches	no matches	no matches	no matches	NA
94397	0.254151	0.491092	0.160224	Organic compounds	Aromatic heteropolycyclic compounds	Organoheterocyclic compounds	Organooxygen compounds	NA	Sesquiterpenoids	NA
114625	0.0184818	0.086592	0.808594	Organic compounds	Aromatic heteromonocyclic compounds	Lipids and lipid-like molecules	Prenol lipids	NA	Diterpene lactones	NA
67922	0.32831	0.565474	0.321431	no matches	no matches	no matches	no matches	no matches	no matches	NA
137922	0.465818	0.676806	-0.185542	Organic compounds	Aliphatic acyclic compounds	Lipids and lipid-like molecules	Fatty Acyls	Fatty acid esters	Acyl carnitines	NA
124392	7.69e-05	0.00105551	-1.58037	no matches	no matches	no matches	no matches	no matches	no matches	NA
117774	0.0438545	0.158045	-0.588183	Organic compounds	Aliphatic homopolycyclic compounds	Lipids and lipid-like molecules	Prenol lipids	Diterpenoids	Diterpenoids	NA
116672	0.0472664	0.16604	0.150146	no matches	no matches	no matches	no matches	no matches	no matches	NA
83491	0.682757	0.816005	-0.268964	no matches	no matches	no matches	no matches	no matches	no matches	NA
117662	0.636662	0.784969	0.0624657	no matches	no matches	no matches	no matches	no matches	no matches	NA
99320	3.48e-07	8.32e-06	-0.549313	Organic compounds	Aliphatic acyclic compounds	Lipids and lipid-like molecules	Prenol lipids	Ethers	Polyprenyl quinols	NA
5068	0.219844	0.448867	-0.473827	Organic compounds	Aliphatic acyclic compounds	Lipids and lipid-like molecules	Fatty Acyls	NA	Medium-chain fatty acids	NA
129916	0.0891862	0.266274	0.515146	no matches	no matches	no matches	no matches	no matches	no matches	NA
44731	0.842819	0.921134	0.0929693	Organic compounds	Aliphatic acyclic compounds	Lipids and lipid-like molecules	Fatty Acyls	Carbohydrates and carbohydrate conjugates	Glucuronic acid derivatives	MUCIC ACID
1388	0.908875	0.952584	0.0981081	no matches	no matches	no matches	no matches	no matches	no matches	NA
87181	0.000126725	0.00156505	-0.926519	Organic compounds	Aromatic heteropolycyclic compounds	Lipids and lipid-like molecules	Fatty Acyls	NA	Long-chain fatty acids	NA
671	0.758657	0.869312	0.29916	Organic compounds	Aliphatic acyclic compounds	Organic acids and derivatives	Hydroxy acids and derivatives	Medium-chain hydroxy acids and derivatives	Medium-chain hydroxy acids and derivatives	NA
125101	0.0461687	0.164476	-0.635632	no matches	no matches	no matches	no matches	no matches	no matches	NA
147032	0.0950437	0.278369	-0.464873	Organic compounds	Aromatic heteropolycyclic compounds	Lipids and lipid-like molecules	Prenol lipids	NA	5,10-cycloaromadendrane sesquiterpenoids	NA
104878	0.000757485	0.00696321	0.923306	no matches	no matches	no matches	no matches	no matches	no matches	NA
113044	0.356564	0.592408	0.304081	Organic compounds	Aromatic heteropolycyclic compounds	Organoheterocyclic compounds	Prenol lipids	NA	Phenylazetidines	NA
150961	0.00194336	0.0150003	-0.556466	Organic compounds	Aromatic heteropolycyclic compounds	Lipids and lipid-like molecules	Prenol lipids	NA	Acyl carnitines	NA
125225	2.66e-09	7.03e-08	-2.42679	Organic compounds	Aromatic heteropolycyclic compounds	Lipids and lipid-like molecules	Prenol lipids	NA	Macrolactams	NA
127558	0.565156	0.74916	0.455967	Organic compounds	Aromatic heteropolycyclic compounds	Lipids and lipid-like molecules	Prenol lipids	Sesquiterpenoids	Sesquiterpenoids	NA
145057	0.160299	0.363898	-0.225606	Organic compounds	Aromatic heteropolycyclic compounds	Lipids and lipid-like molecules	Prenol lipids	Triterpenoids	Triterpenoids	NA
48022	0.55601	0.743688	0.185419	Organic compounds	Aromatic heteropolycyclic compounds	Organoheterocyclic compounds	Benzimidazoles	Phenylbenzimidazoles	Phenylbenzimidazoles	NA
117126	0.0129137	0.0664515	-0.729272	Organic compounds	Aliphatic heteropolycyclic compounds	Lipids and lipid-like molecules	Fatty Acyls	NA	Long-chain fatty acids	NA
124118	0.588103	0.761051	0.264173	no matches	no matches	no matches	no matches	no matches	no matches	NA
117814	0.0180507	0.086592	0.141572	no matches	no matches	no matches	no matches	no matches	no matches	NA
118834	0.226166	0.455405	0.0608211	no matches	no matches	no matches	no matches	no matches	no matches	NA
111583	0.159389	0.363406	0.37305	no matches	no matches	no matches	no matches	no matches	no matches	NA
87116	0.459002	0.668213	0.135439	Organic compounds	Aliphatic heteromonocyclic compounds	Organoheterocyclic compounds	Piperidines	N-acylpiperidines	N-acylpiperidines	NA
65719	0.538306	0.73595	-0.209006	Organic compounds	Aliphatic heteropolycyclic compounds	Lipids and lipid-like molecules	Prenol lipids	Terpene lactones	Germacranolides and derivatives	NA
60154	0.209145	0.43927	-0.216428	no matches	no matches	no matches	no matches	no matches	no matches	NA
71871	0.0185805	0.086592	-0.688078	no matches	no matches	no matches	no matches	no matches	no matches	Spectral Match to 9(10)-EpOME from NIST14
122099	0.581058	0.759372	0.0152714	Organic compounds	Aliphatic acyclic compounds	Lipids and lipid-like molecules	Prenol lipids	Triterpenoids	Triterpenoids	NA
96418	0.00431207	0.0293142	0.939292	no matches	no matches	no matches	no matches	no matches	no matches	NA
112213	0.661895	0.804191	0.290326	Organic compounds	Aliphatic homopolycyclic compounds	Lipids and lipid-like molecules	Prenol lipids	NA	Cholesterols and derivatives	NA
91210	0.669617	0.804191	-0.067635	Organic compounds	Aliphatic acyclic compounds	Lipids and lipid-like molecules	Fatty Acyls	Fatty acid esters	Acyl carnitines	NA
42079	0.690716	0.822863	-0.0593877	Organic compounds	Aliphatic heteromonocyclic compounds	Lipids and lipid-like molecules	Fatty Acyls	NA	Lupinine-type alkaloids	Spectral Match to Myristoleic acid from NIST14
143322	0.0950122	0.278369	0.292586	no matches	no matches	no matches	no matches	no matches	no matches	NA
33625	0.374068	0.602006	-0.12311	Organic compounds	Aromatic heteropolycyclic compounds	Organoheterocyclic compounds	Benzene and substituted derivatives	NA	Fluorobenzenes	NA
145854	0.172334	0.381192	0.250947	Organic compounds	Aromatic heteropolycyclic compounds	Lipids and lipid-like molecules	Steroids and steroid derivatives	NA	Triterpenoids	NA
113320	0.405506	0.625729	0.113616	no matches	no matches	no matches	no matches	no matches	no matches	NA
117625	0.595889	0.762633	-0.0479917	no matches	no matches	no matches	no matches	no matches	no matches	NA
119700	0.383537	0.608317	0.0842004	Organic compounds	Aromatic heteropolycyclic compounds	Lipids and lipid-like molecules	Fatty Acyls	Diterpenoids	Biphenyls and derivatives	NA
110419	0.856789	0.92757	0.0544626	Organic compounds	Aromatic heteropolycyclic compounds	Organoheterocyclic compounds	Organooxygen compounds	NA	Alkyl-phenylketones	NA
126876	0.826513	0.913536	0.0733357	no matches	no matches	no matches	no matches	no matches	no matches	NA
99891	0.594193	0.762633	-0.279665	no matches	no matches	no matches	no matches	no matches	no matches	NA
110736	0.000246888	0.0028585	1.02988	no matches	no matches	no matches	no matches	no matches	no matches	NA
105515	0.00409888	0.0281229	0.852138	Organic compounds	Aliphatic heteropolycyclic compounds	Lipids and lipid-like molecules	Carboxylic acids and derivatives	Carboxylic acid derivatives	Acetamides	NA
128042	0.542125	0.737433	-0.0445748	no matches	no matches	no matches	no matches	no matches	no matches	NA
75350	0.143247	0.344513	-0.630424	Organic compounds	Aromatic heteropolycyclic compounds	Lipids and lipid-like molecules	Prenol lipids	NA	Triterpenoids	NA
85101	0.922841	0.956919	-0.146371	Organic compounds	Aromatic heteropolycyclic compounds	Organoheterocyclic compounds	Organooxygen compounds	NA	Sesquiterpenoids	NA
126475	0.00366452	0.0261097	1.43092	Organic compounds	Aromatic heteropolycyclic compounds	Lipids and lipid-like molecules	Prenol lipids	NA	Acyl carnitines	NA
120158	0.117353	0.31168	-0.185118	no matches	no matches	no matches	no matches	no matches	no matches	NA
103382	0.891423	0.943635	-0.0135698	Organic compounds	Aliphatic homopolycyclic compounds	Lipids and lipid-like molecules	Prenol lipids	NA	Diterpenoids	NA
140121	0.271751	0.511914	-0.344185	Organic compounds	Aromatic heteropolycyclic compounds	Lipids and lipid-like molecules	Steroids and steroid derivatives	NA	Pentahydroxy bile acids, alcohols and derivatives	NA
127104	5.01e-29	1.4e-26	-4.85622	Organic compounds	Aromatic heteropolycyclic compounds	Lipids and lipid-like molecules	Carboxylic acids and derivatives	NA	Naphthothiazoles	NA
146710	0.907557	0.952584	-0.0507415	Organic compounds	Aromatic heteropolycyclic compounds	Lipids and lipid-like molecules	Steroids and steroid derivatives	NA	Triterpenoids	NA
113441	0.987005	0.992911	-0.0148179	Organic compounds	Aliphatic homopolycyclic compounds	Lipids and lipid-like molecules	Steroids and steroid derivatives	Cholestane steroids	Cholesterols and derivatives	NA
3096	0.755782	0.869312	0.339683	Organic compounds	Aromatic heteropolycyclic compounds	Organoheterocyclic compounds	Benzene and substituted derivatives	NA	Benzoic acids	NA
86139	0.166202	0.372073	0.35457	no matches	no matches	no matches	no matches	no matches	no matches	NA
121554	0.0993965	0.286587	0.0509887	no matches	no matches	no matches	no matches	no matches	no matches	NA
119570	0.0257988	0.110502	0.133087	Organic compounds	Aliphatic homopolycyclic compounds	Lipids and lipid-like molecules	Prenol lipids	Diterpenoids	Kaurane diterpenoids	NA
142602	0.0124414	0.0647216	0.254933	Organic compounds	Aromatic heteropolycyclic compounds	Lipids and lipid-like molecules	Steroids and steroid derivatives	NA	Triterpenoids	PC(0:0/20:4); [M+H]+ C28H51N1O7P1
19099	0.0383295	0.146268	-0.385969	Organic compounds	Aliphatic acyclic compounds	Lipids and lipid-like molecules	Fatty Acyls	Fatty alcohols	Fatty alcohols	NA
60868	0.706516	0.835419	-0.0700318	Organic compounds	Aromatic heteropolycyclic compounds	Organoheterocyclic compounds	Indoles and derivatives	NA	Indoles and derivatives	NA
139586	0.0391085	0.146875	0.0833374	Organic compounds	Aromatic heteropolycyclic compounds	Lipids and lipid-like molecules	Glycerophospholipids	NA	1-acyl-sn-glycero-3-phosphoethanolamines	NA
95139	0.41354	0.631449	-0.215258	Organic compounds	Aliphatic homopolycyclic compounds	Lipids and lipid-like molecules	Prenol lipids	NA	Diterpenoids	NA
142880	0.328906	0.565474	0.208327	no matches	no matches	no matches	no matches	no matches	no matches	NA
14195	0.434243	0.647433	-0.244965	Organic compounds	Aliphatic acyclic compounds	Lipids and lipid-like molecules	Fatty Acyls	Fatty acids and conjugates	Medium-chain fatty acids	NA
138073	0.151097	0.354312	0.405696	Organic compounds	Aromatic heteropolycyclic compounds	Lipids and lipid-like molecules	Prenol lipids	NA	Triterpenoids	NA
61129	0.319421	0.558315	0.624105	no matches	no matches	no matches	no matches	no matches	no matches	NA
126609	5.23e-05	0.00077481	-1.55898	no matches	no matches	no matches	no matches	no matches	no matches	NA
134497	0.576325	0.75767	-0.259273	no matches	no matches	no matches	no matches	no matches	no matches	NA
104429	0.209261	0.43927	0.481466	Organic compounds	Aliphatic homopolycyclic compounds	Lipids and lipid-like molecules	Prenol lipids	NA	Diterpenoids	NA
124683	0.144533	0.344513	-1.03979	no matches	no matches	no matches	no matches	no matches	no matches	NA
96883	0.368033	0.599367	0.562031	Organic compounds	Aromatic heteropolycyclic compounds	Lipids and lipid-like molecules	Prenol lipids	Fatty acids and conjugates	Diterpenoids	NA
89383	0.936594	0.966596	-0.0522518	Organic compounds	Aromatic heteropolycyclic compounds	Lipids and lipid-like molecules	Prenol lipids	NA	Long-chain fatty acids	NA
127107	6.47e-20	7.99e-18	-2.0988	Organic compounds	Aliphatic homopolycyclic compounds	Lipids and lipid-like molecules	Steroids and steroid derivatives	Bile acids, alcohols and derivatives	Triterpenoids	NA
104435	0.154499	0.357623	0.480513	no matches	no matches	no matches	no matches	no matches	no matches	NA
87578	0.108151	0.297917	-0.211409	no matches	no matches	no matches	no matches	no matches	no matches	NA
40536	0.613513	0.770697	-0.147814	Organic compounds	Aliphatic acyclic compounds	Lipids and lipid-like molecules	Benzene and substituted derivatives	NA	Phenylpropanes	NA
77373	0.119712	0.312347	-0.530714	Organic compounds	Aliphatic heteropolycyclic compounds	Organoheterocyclic compounds	Carboxylic acids and derivatives	NA	Lupinine-type alkaloids	NA
113223	0.440006	0.650787	0.190928	no matches	no matches	no matches	no matches	no matches	no matches	NA
147144	0.0450688	0.161333	0.361348	Organic compounds	Aromatic heteropolycyclic compounds	Lipids and lipid-like molecules	Prenol lipids	NA	Gluco/mineralocorticoids, progestogins and derivatives	NA
3104	0.828296	0.913536	0.0987666	Organic compounds	Aromatic heteropolycyclic compounds	Organoheterocyclic compounds	Benzene and substituted derivatives	NA	Benzoic acids	NA
61196	0.0257119	0.110502	1.16156	no matches	no matches	no matches	no matches	no matches	no matches	NA
111133	0.615494	0.770697	-0.244014	no matches	no matches	no matches	no matches	no matches	no matches	NA
71991	8.83e-06	0.000152194	-0.680902	Organic compounds	Aliphatic acyclic compounds	Lipids and lipid-like molecules	Prenol lipids	NA	Sesquiterpenoids	Spectral Match to Dibutyl phthalate from NIST14
85704	0.0122274	0.0642589	-0.937186	Organic compounds	Aromatic heteropolycyclic compounds	Organoheterocyclic compounds	Organooxygen compounds	NA	Sesquiterpenoids	NA
118829	0.52599	0.728312	-0.223986	Organic compounds	Aromatic heteromonocyclic compounds	Lipids and lipid-like molecules	Prenol lipids	Amino acids, peptides, and analogues	Delta amino acids and derivatives	NA
122217	0.214576	0.444258	0.25144	no matches	no matches	no matches	no matches	no matches	no matches	NA
142496	0.308525	0.549561	-0.483604	Organic compounds	Aliphatic heteropolycyclic compounds	Lipids and lipid-like molecules	Prenol lipids	Diterpenoids	Hybrid peptides	NA
99579	0.586348	0.761051	-0.123134	Organic compounds	Aromatic heteropolycyclic compounds	Lipids and lipid-like molecules	Prenol lipids	NA	Stilbenes	NA
62227	0.407019	0.625729	-0.121899	no matches	no matches	no matches	no matches	no matches	no matches	NA
91708	0.000761161	0.00696321	0.639079	no matches	no matches	no matches	no matches	no matches	no matches	NA
113333	0.552707	0.741911	0.226089	Organic compounds	Aliphatic homopolycyclic compounds	Lipids and lipid-like molecules	Prenol lipids	Diterpenoids	Diterpenoids	NA
111016	0.50799	0.711775	0.50348	Organic compounds	Aromatic heteropolycyclic compounds	Lipids and lipid-like molecules	Prenol lipids	NA	Long-chain fatty acids	NA
142604	0.0299827	0.122747	-0.44545	Organic compounds	Aromatic heteropolycyclic compounds	Lipids and lipid-like molecules	Prenol lipids	NA	2,4-disubstituted thiazoles	NA
67759	0.371349	0.602006	0.14425	Organic compounds	Aromatic heteropolycyclic compounds	Organoheterocyclic compounds	Carboxylic acids and derivatives	NA	Tetralins	NA
140168	0.286823	0.527384	-0.262754	Organic compounds	Aromatic heteropolycyclic compounds	Lipids and lipid-like molecules	Steroids and steroid derivatives	NA	Triterpenoids	NA
104424	0.529276	0.728984	-0.00374858	Organic compounds	Aliphatic homopolycyclic compounds	Lipids and lipid-like molecules	Prenol lipids	NA	Diterpenoids	NA
70701	0.00720412	0.0437562	-0.300579	Organic compounds	Aromatic heteropolycyclic compounds	Organoheterocyclic compounds	Prenol lipids	NA	Sesquiterpenoids	Spectral Match to 9,12-Octadecadiynoic Acid from NIST14
147887	0.422707	0.637935	-0.426339	no matches	no matches	no matches	no matches	no matches	no matches	NA
49056	0.102341	0.290346	0.439567	Organic compounds	Aromatic heteromonocyclic compounds	Organoheterocyclic compounds	Organonitrogen compounds	NA	Medium-chain hydroxy acids and derivatives	NA
4853	0.478276	0.6895	-0.00734297	Organic compounds	Aliphatic acyclic compounds	Lipids and lipid-like molecules	Fatty Acyls	NA	Stilbenes	NA
85662	0.314185	0.551812	0.168783	Organic compounds	Aliphatic acyclic compounds	Lipids and lipid-like molecules	Fatty Acyls	Fatty acid esters	Acyl carnitines	NA
20869	0.278924	0.520612	0.703434	no matches	no matches	no matches	no matches	no matches	no matches	NA
100728	0.3663	0.599179	-0.124279	Organic compounds	Aliphatic homopolycyclic compounds	Lipids and lipid-like molecules	Steroids and steroid derivatives	Pregnane steroids	Pregnane steroids	NA
130548	0.690124	0.822863	0.364226	Organic compounds	Aliphatic heteropolycyclic compounds	Lipids and lipid-like molecules	Steroids and steroid derivatives	Steroidal glycosides	Triterpenoids	NA
96624	0.0803717	0.245254	0.479821	no matches	no matches	no matches	no matches	no matches	no matches	NA
126875	0.01845	0.086592	-0.0505871	Organic compounds	Aromatic heteropolycyclic compounds	Lipids and lipid-like molecules	Carboxylic acids and derivatives	NA	Hybrid peptides	NA
124461	0.10136	0.288875	0.834309	Organic compounds	Aromatic heteropolycyclic compounds	Lipids and lipid-like molecules	Prenol lipids	NA	Diterpenoids	NA
110735	0.0677394	0.218239	0.793098	Organic compounds	Aromatic heteropolycyclic compounds	Organoheterocyclic compounds	Organooxygen compounds	NA	Sesquiterpenoids	NA
142518	0.155404	0.357623	0.831459	Organic compounds	Aliphatic acyclic compounds	Lipids and lipid-like molecules	Prenol lipids	NA	Triterpenoids	Spectral Match to N-Lauroylsarcosine from NIST14
117235	0.0425746	0.154648	0.863014	Organic compounds	Aliphatic homopolycyclic compounds	Lipids and lipid-like molecules	Prenol lipids	Diterpenoids	Diterpenoids	NA
67950	0.79385	0.893986	-0.137393	no matches	no matches	no matches	no matches	no matches	no matches	NA
116667	0.601192	0.765436	-0.224507	Organic compounds	Aromatic heteropolycyclic compounds	Organoheterocyclic compounds	Benzene and substituted derivatives	NA	Sesquiterpenoids	NA
134919	0.000727247	0.00690884	-0.709147	no matches	no matches	no matches	no matches	no matches	no matches	NA
89129	0.669091	0.804191	-0.172888	no matches	no matches	no matches	no matches	no matches	no matches	NA
116302	0.00144537	0.0119002	1.20646	no matches	no matches	no matches	no matches	no matches	no matches	NA
79559	0.00263557	0.0195296	-0.952683	Organic compounds	Aromatic heteropolycyclic compounds	Organoheterocyclic compounds	Benzene and substituted derivatives	NA	Sesquiterpenoids	NA
139580	0.0141118	0.0711349	-0.712737	Organic compounds	Aromatic heteropolycyclic compounds	Lipids and lipid-like molecules	Steroids and steroid derivatives	NA	Triterpenoids	NA
98849	0.614824	0.770697	0.0354064	Organic compounds	Aliphatic heteromonocyclic compounds	Lipids and lipid-like molecules	Pyrrolidines	NA	Pyrrolidines	NA
117124	0.124066	0.319212	0.107058	Organic compounds	Aromatic heteropolycyclic compounds	Organoheterocyclic compounds	Organooxygen compounds	Carbohydrates and carbohydrate conjugates	Phenolic glycosides	NA
87577	0.116307	0.31113	0.324613	Organic compounds	Aliphatic homopolycyclic compounds	Lipids and lipid-like molecules	Prenol lipids	NA	Diterpenoids	NA
70821	0.0121115	0.0642589	-0.294876	Organic compounds	Aliphatic heteropolycyclic compounds	Lipids and lipid-like molecules	Prenol lipids	NA	Sesquiterpenoids	NA
126868	0.352918	0.590122	-0.0110862	Organic compounds	Aromatic heteropolycyclic compounds	Alkaloids and derivatives	Lupin alkaloids	Lupinine-type alkaloids	Lupinine-type alkaloids	NA
125461	0.762724	0.871243	0.126134	Organic compounds	Aromatic heteropolycyclic compounds	Lipids and lipid-like molecules	Prenol lipids	Sesquiterpenoids	Eudesmane, isoeudesmane or cycloeudesmane sesquiterpenoids	taurohyodeoxycholic acid
75436	0.981446	0.990806	0.0469966	no matches	no matches	no matches	no matches	no matches	no matches	Spectral Match to Elaidic acid from NIST14
64920	0.452181	0.65958	-0.229946	Organic compounds	Aliphatic acyclic compounds	Organoheterocyclic compounds	Fatty Acyls	NA	Oxanes	NA
82784	0.436322	0.648445	0.424003	no matches	no matches	no matches	no matches	no matches	no matches	NA
80319	0.00922227	0.0529744	-1.0478	Organic compounds	Aromatic heteropolycyclic compounds	Organoheterocyclic compounds	Organooxygen compounds	NA	Sesquiterpenoids	NA
80684	0.000745703	0.00696321	-0.875387	Organic compounds	Aliphatic acyclic compounds	Lipids and lipid-like molecules	Fatty Acyls	NA	Long-chain fatty acids	NA
135486	0.000269215	0.00302255	-0.959069	Organic compounds	Aromatic heteropolycyclic compounds	Lipids and lipid-like molecules	Steroids and steroid derivatives	NA	Triterpenoids	NA
66809	0.533529	0.73212	0.373073	no matches	no matches	no matches	no matches	no matches	no matches	NA
120741	0.0753587	0.233368	0.677118	no matches	no matches	no matches	no matches	no matches	no matches	NA
36000	0.718739	0.845374	0.311884	Organic compounds	Aromatic heteropolycyclic compounds	Organoheterocyclic compounds	Indoles and derivatives	NA	Acyl carnitines	NA
135264	0.699285	0.830401	0.191026	no matches	no matches	no matches	no matches	no matches	no matches	NA
111840	0.887319	0.941981	-0.0884089	Organic compounds	Aliphatic homopolycyclic compounds	Lipids and lipid-like molecules	Steroids and steroid derivatives	Oxosteroids	20-oxosteroids	NA
120162	0.000541254	0.0054941	0.497977	Organic compounds	Aliphatic heteropolycyclic compounds	Lipids and lipid-like molecules	Prenol lipids	Amino acids, peptides, and analogues	Diterpenoids	NA
124051	0.0390542	0.146875	-0.0159782	no matches	no matches	no matches	no matches	no matches	no matches	NA
113481	0.885679	0.94159	-0.0692788	Organic compounds	Aliphatic acyclic compounds	Lipids and lipid-like molecules	Fatty Acyls	Fatty acids and conjugates	Eudesmanolides, secoeudesmanolides, and derivatives	NA
120266	0.0181437	0.086592	-0.438271	no matches	no matches	no matches	no matches	no matches	no matches	NA
146424	0.0346803	0.135253	-0.268139	Organic compounds	Aromatic heteropolycyclic compounds	Lipids and lipid-like molecules	Prenol lipids	NA	2,4-disubstituted thiazoles	NA
114278	0.246637	0.482211	0.15268	Organic compounds	Aliphatic acyclic compounds	Lipids and lipid-like molecules	Prenol lipids	Diterpenoids	Aconitane-type diterpenoid alkaloids	NA
90006	0.063917	0.208646	-0.616979	Organic compounds	Aromatic heteropolycyclic compounds	Lipids and lipid-like molecules	Prenol lipids	NA	Long-chain fatty acids	NA
79907	0.367117	0.599193	-0.118069	Organic compounds	Aliphatic homopolycyclic compounds	Lipids and lipid-like molecules	Prenol lipids	NA	Diterpenoids	NA
98327	0.168375	0.373549	-1.26286	no matches	no matches	no matches	no matches	no matches	no matches	NA
117136	0.194031	0.414344	0.535287	Organic compounds	Aromatic heteromonocyclic compounds	Lipids and lipid-like molecules	Prenol lipids	Amino acids, peptides, and analogues	Delta amino acids and derivatives	NA
8179	0.680257	0.815648	0.422642	Organic compounds	Aliphatic heteropolycyclic compounds	Organoheterocyclic compounds	Piperidines	NA	Piperidines	NA
70836	0.0498602	0.173457	-0.412965	no matches	no matches	no matches	no matches	no matches	no matches	Spectral Match to 13S-Hydroxy-9Z,11E,15Z-octadecatrienoic acid from NIST14
93972	0.563812	0.74916	0.255164	Organic compounds	Aliphatic homopolycyclic compounds	Lipids and lipid-like molecules	Prenol lipids	NA	Diterpenoids	NA
665	0.333714	0.570222	-0.358501	Organic compounds	Aromatic homomonocyclic compounds	Benzenoids	Benzene and substituted derivatives	NA	Aniline and substituted anilines	NA
113490	0.00510963	0.0329238	-0.807865	no matches	no matches	no matches	no matches	no matches	no matches	NA
64472	0.706893	0.835419	0.120238	Organic compounds	Aliphatic heteropolycyclic compounds	Lipids and lipid-like molecules	Prenol lipids	NA	Sesquiterpenoids	NA
120168	0.0890727	0.266274	0.269058	Organic compounds	Aromatic heteropolycyclic compounds	Lipids and lipid-like molecules	Carboxylic acids and derivatives	Amino acids, peptides, and analogues	Alpha amino acid amides	NA
130261	0.311887	0.551373	0.141256	no matches	no matches	no matches	no matches	no matches	no matches	NA
93671	0.000326189	0.00350299	1.17033	Organic compounds	Aliphatic acyclic compounds	Lipids and lipid-like molecules	Fatty Acyls	Fatty acid esters	Acyl carnitines	NA
83264	0.736916	0.856226	0.058158	Organic compounds	Aromatic heteropolycyclic compounds	Lipids and lipid-like molecules	Prenol lipids	NA	Long-chain fatty acids	Spectral Match to (+/-)-11-Hydroxy-5Z,8Z,12E,14Z,17Z-eicosapentaenoic acid from NIST14
79898	0.728196	0.849897	-0.0324378	no matches	no matches	no matches	no matches	no matches	no matches	NA
56886	0.564206	0.74916	0.377928	no matches	no matches	no matches	no matches	no matches	no matches	NA
122513	3.77e-09	9.64e-08	-1.70731	Organic compounds	Aromatic heteropolycyclic compounds	Lipids and lipid-like molecules	Prenol lipids	NA	Macrolactams	NA
109846	0.00200503	0.0153168	-0.861246	Organic compounds	Aliphatic homopolycyclic compounds	Organic acids and derivatives	Carboxylic acids and derivatives	Amino acids, peptides, and analogues	Delta amino acids and derivatives	NA
148376	0.614984	0.770697	-0.022121	Organic compounds	Aromatic heteropolycyclic compounds	Lipids and lipid-like molecules	Steroids and steroid derivatives	NA	Triterpenoids	NA
127103	5.68e-29	1.4e-26	-4.00613	Organic compounds	Aromatic heteropolycyclic compounds	Organoheterocyclic compounds	Prenol lipids	NA	Cytisine and derivatives	NA
3094	0.143357	0.344513	-0.350604	Organic compounds	Aromatic heteropolycyclic compounds	Organoheterocyclic compounds	Benzene and substituted derivatives	NA	Benzoic acids	NA
119501	2.08e-06	4.28e-05	-1.39816	no matches	no matches	no matches	no matches	no matches	no matches	NA
100652	0.148878	0.350217	-0.504896	no matches	no matches	no matches	no matches	no matches	no matches	NA
74165	0.238106	0.472066	-0.546958	Organic compounds	Aromatic heteropolycyclic compounds	Organoheterocyclic compounds	Carboxylic acids and derivatives	NA	Xanthines	NA
145429	0.0832061	0.251656	0.264635	Organic compounds	Aromatic heteropolycyclic compounds	Lipids and lipid-like molecules	Prenol lipids	NA	Triterpenoids	NA
88391	0.21277	0.443016	-0.360398	no matches	no matches	no matches	no matches	no matches	no matches	NA
109599	0.0606818	0.200737	1.36307	Organic compounds	Aliphatic acyclic compounds	Lipids and lipid-like molecules	Fatty Acyls	Fatty acid esters	Acyl carnitines	NA
86863	0.129229	0.324606	-0.458974	Organic compounds	Aliphatic homopolycyclic compounds	Lipids and lipid-like molecules	Prenol lipids	Diterpenoids	Diterpenoids	NA
70052	0.777739	0.882549	-0.146312	no matches	no matches	no matches	no matches	no matches	no matches	NA
75085	0.0216748	0.097933	1.03417	Organic compounds	Aromatic heteropolycyclic compounds	Organoheterocyclic compounds	Carboxylic acids and derivatives	NA	Dipeptides	NA
112406	0.00545426	0.0348415	-0.4845	no matches	no matches	no matches	no matches	no matches	no matches	NA
65345	0.0563806	0.189041	0.799519	no matches	no matches	no matches	no matches	no matches	no matches	NA
96047	0.00485827	0.0315788	1.02253	Organic compounds	Aromatic heteropolycyclic compounds	Organoheterocyclic compounds	Coumarins and derivatives	NA	Coumarins and derivatives	NA
94409	0.295436	0.533947	-0.115248	no matches	no matches	no matches	no matches	no matches	no matches	NA
144753	0.216387	0.446636	-0.0768692	no matches	no matches	no matches	no matches	no matches	no matches	NA
48473	0.911106	0.953311	0.142408	no matches	no matches	no matches	no matches	no matches	no matches	NA
116671	0.0515621	0.177559	0.499563	Organic compounds	Aromatic heteropolycyclic compounds	Lipids and lipid-like molecules	Steroids and steroid derivatives	NA	Steroid esters	NA
83733	0.0108907	0.0589051	-0.55062	no matches	no matches	no matches	no matches	no matches	no matches	NA
114651	0.281144	0.52178	-1.1879	no matches	no matches	no matches	no matches	no matches	no matches	NA
110766	0.579514	0.758692	-0.178415	Organic compounds	Aromatic heteromonocyclic compounds	Organoheterocyclic compounds	Prenol lipids	Pyrazoles	Phenylpyrazoles	NA
86654	8.43e-07	1.89e-05	-0.943083	Organic compounds	Aliphatic acyclic compounds	Lipids and lipid-like molecules	Fatty Acyls	Fatty acid esters	Acyl carnitines	NA
135189	0.974102	0.990806	0.0285454	Organic compounds	Aromatic heteropolycyclic compounds	Lipids and lipid-like molecules	Prenol lipids	Terpene glycosides	Diterpene glycosides	NA
95405	0.655188	0.799826	-0.197446	no matches	no matches	no matches	no matches	no matches	no matches	NA
95522	0.558542	0.745233	-0.162595	no matches	no matches	no matches	no matches	no matches	no matches	NA
100024	0.10731	0.297191	0.381884	Organic compounds	Aliphatic homopolycyclic compounds	Lipids and lipid-like molecules	Prenol lipids	NA	Diterpenoids	NA
121278	0.444083	0.65551	0.23934	no matches	no matches	no matches	no matches	no matches	no matches	NA
121325	5.56e-06	0.000103061	-1.20862	Organic compounds	Aromatic heteropolycyclic compounds	Organic acids and derivatives	Carboxylic acids and derivatives	Amino acids, peptides, and analogues	Dipeptides	NA
120171	0.420741	0.637227	0.391562	no matches	no matches	no matches	no matches	no matches	no matches	NA
110380	0.355855	0.592408	-0.294556	Organic compounds	Aromatic heteromonocyclic compounds	Lipids and lipid-like molecules	Prenol lipids	Amino acids, peptides, and analogues	Delta amino acids and derivatives	NA
120968	0.00194174	0.0150003	0.453291	no matches	no matches	no matches	no matches	no matches	no matches	NA
120672	0.289214	0.530464	-0.409418	Organic compounds	Aliphatic homopolycyclic compounds	Lipids and lipid-like molecules	Prenol lipids	Bile acids, alcohols and derivatives	Tetrahydroxy bile acids, alcohols and derivatives	NA
120035	1.5e-05	0.000253423	1.27492	Organic compounds	Aliphatic heteropolycyclic compounds	Lipids and lipid-like molecules	Steroids and steroid derivatives	Steroidal alkaloids	Acyl carnitines	NA
112211	0.0133547	0.0677798	-1.45561	Organic compounds	Aliphatic acyclic compounds	Lipids and lipid-like molecules	Fatty Acyls	Fatty alcohols	Fatty alcohols	NA
18991	0.664359	0.804191	0.24746	Organic compounds	Aliphatic acyclic compounds	Lipids and lipid-like molecules	Prenol lipids	Monoterpenoids	Menthane monoterpenoids	NA
90013	0.152727	0.355882	-0.530137	Organic compounds	Aromatic heteropolycyclic compounds	Lipids and lipid-like molecules	Prenol lipids	NA	Sesquiterpenoids	NA
111368	0.902623	0.950062	0.0938911	Organic compounds	Aliphatic homopolycyclic compounds	Lipids and lipid-like molecules	Prenol lipids	NA	Cholesterols and derivatives	NA
94626	1.08e-09	3.21e-08	-1.24131	Organic compounds	Aliphatic homopolycyclic compounds	Lipids and lipid-like molecules	Steroids and steroid derivatives	Pregnane steroids	Gluco/mineralocorticoids, progestogins and derivatives	NA
94814	5.19e-05	0.00077481	-0.9051	no matches	no matches	no matches	no matches	no matches	no matches	NA
121186	0.421378	0.637227	0.391657	no matches	no matches	no matches	no matches	no matches	no matches	NA
117135	0.751594	0.866145	0.250992	no matches	no matches	no matches	no matches	no matches	no matches	NA
121931	9.6e-19	8.9e-17	-3.9995	Organic compounds	Aromatic heteropolycyclic compounds	Organoheterocyclic compounds	Benzene and substituted derivatives	NA	Diphenylmethanes	NA
137788	0.0392459	0.146875	0.49871	Organic compounds	Aromatic heteropolycyclic compounds	Lipids and lipid-like molecules	Steroids and steroid derivatives	NA	Alkyl aryl ethers	NA
114600	0.00216865	0.016232	1.69714	no matches	no matches	no matches	no matches	no matches	no matches	NA
121192	0.474115	0.686963	0.0553392	Organic compounds	Aromatic heteropolycyclic compounds	Lipids and lipid-like molecules	Prenol lipids	Sesquiterpenoids	Triterpenoids	NA
121717	0.769984	0.876434	-0.0363786	Organic compounds	Aromatic heteropolycyclic compounds	Organic acids and derivatives	Peptidomimetics	Depsipeptides	Cyclic depsipeptides	NA
85853	0.576688	0.75767	0.189288	Organic compounds	Aromatic heteropolycyclic compounds	Organoheterocyclic compounds	Indoles and derivatives	NA	Strychnos alkaloids	NA
101300	0.180614	0.393632	0.629563	Organic compounds	Aromatic heteropolycyclic compounds	Lipids and lipid-like molecules	Prenol lipids	NA	Eudesmanolides, secoeudesmanolides, and derivatives	NA
106133	0.160587	0.363898	0.449223	Organic compounds	Aromatic heteropolycyclic compounds	Lipids and lipid-like molecules	Prenol lipids	NA	Eudesmanolides, secoeudesmanolides, and derivatives	NA
65692	0.278767	0.520612	-0.664788	Organic compounds	Aromatic heteropolycyclic compounds	Organoheterocyclic compounds	Benzene and substituted derivatives	NA	Benzimidazoles	NA
93670	0.167235	0.373257	0.408013	Organic compounds	Aliphatic acyclic compounds	Lipids and lipid-like molecules	Fatty Acyls	Fatty acid esters	Acyl carnitines	NA
117283	0.360633	0.595165	-0.322456	no matches	no matches	no matches	no matches	no matches	no matches	NA
121996	5.45e-14	3.11e-12	-3.6052	no matches	no matches	no matches	no matches	no matches	no matches	NA
55343	0.599251	0.764927	-0.147946	no matches	no matches	no matches	no matches	no matches	no matches	NA
129745	0.0233939	0.103802	-0.799647	no matches	no matches	no matches	no matches	no matches	no matches	NA
94646	0.00376207	0.0265495	-0.159822	no matches	no matches	no matches	no matches	no matches	no matches	NA
97389	0.648678	0.794497	0.00686626	Organic compounds	Aliphatic homopolycyclic compounds	Lipids and lipid-like molecules	Prenol lipids	Diterpenoids	Sesterterpenoids	NA
83503	0.217136	0.446938	0.0815818	no matches	no matches	no matches	no matches	no matches	no matches	NA
82783	0.401602	0.622567	-0.146027	Organic compounds	Aromatic heteropolycyclic compounds	Lipids and lipid-like molecules	Prenol lipids	NA	Long-chain fatty acids	NA
119475	0.0568255	0.189674	-0.107974	no matches	no matches	no matches	no matches	no matches	no matches	NA
65172	0.285479	0.526219	0.749067	no matches	no matches	no matches	no matches	no matches	no matches	NA
60577	0.802561	0.894283	-0.0542633	Organic compounds	Aromatic heteropolycyclic compounds	Organoheterocyclic compounds	Benzene and substituted derivatives	NA	Benzimidazoles	NA
135719	0.507159	0.711775	-0.363176	Organic compounds	Aromatic heteropolycyclic compounds	Lipids and lipid-like molecules	Prenol lipids	NA	Acyl carnitines	NA
130549	0.0168508	0.0826919	-0.0285407	Organic compounds	Aliphatic heteropolycyclic compounds	Lipids and lipid-like molecules	Steroids and steroid derivatives	Steroidal glycosides	Triterpenoids	NA
52848	0.293473	0.533539	0.170167	Organic compounds	Aliphatic homomonocyclic compounds	Lipids and lipid-like molecules	Prenol lipids	Sesquiterpenoids	Sesquiterpenoids	NA
77359	0.542377	0.737433	-0.276343	Organic compounds	Aromatic heteropolycyclic compounds	Organoheterocyclic compounds	Benzene and substituted derivatives	NA	Benzimidazoles	NA
36167	0.338439	0.57519	-0.351009	Organic compounds	Aliphatic acyclic compounds	Lipids and lipid-like molecules	Fatty Acyls	NA	Medium-chain fatty acids	NA
79362	0.15738	0.361048	0.207123	no matches	no matches	no matches	no matches	no matches	no matches	NA
135822	0.340893	0.578037	0.902416	Organic compounds	Aromatic heteropolycyclic compounds	Lipids and lipid-like molecules	Prenol lipids	NA	Acyl carnitines	NA
4847	0.0721982	0.227071	-0.821246	Organic compounds	Aliphatic acyclic compounds	Lipids and lipid-like molecules	Fatty Acyls	NA	Stilbenes	NA
92152	0.665035	0.804191	-0.0694514	no matches	no matches	no matches	no matches	no matches	no matches	NA
93688	0.400705	0.62248	0.326952	no matches	no matches	no matches	no matches	no matches	no matches	NA
3828	0.111081	0.302615	0.375002	Organic compounds	Aliphatic acyclic compounds	Organic acids and derivatives	Organic sulfonic acids and derivatives	Organosulfonic acids and derivatives	Organosulfonic acids	NA
122116	0.79246	0.893779	0.114745	Organic compounds	Aliphatic homopolycyclic compounds	Lipids and lipid-like molecules	Steroids and steroid derivatives	Cholestane steroids	Cholesterols and derivatives	NA
84507	0.046977	0.16604	0.207757	no matches	no matches	no matches	no matches	no matches	no matches	NA
146398	0.629136	0.776983	0.0615729	Organic compounds	Aliphatic heteropolycyclic compounds	Lipids and lipid-like molecules	Prenol lipids	Diterpenoids	Hybrid peptides	NA
44788	0.64609	0.793951	0.376141	Organic compounds	Aliphatic acyclic compounds	Lipids and lipid-like molecules	Fatty Acyls	Carbohydrates and carbohydrate conjugates	Glucuronic acid derivatives	NA
141855	0.0716754	0.227071	0.0289376	Organic compounds	Aliphatic heteropolycyclic compounds	Lipids and lipid-like molecules	Prenol lipids	NA	Triterpenoids	NA
91702	0.666693	0.804191	-0.276048	Organic compounds	Aromatic heteropolycyclic compounds	Lipids and lipid-like molecules	Prenol lipids	NA	Sesquiterpenoids	NA
64973	0.502797	0.711017	-0.00866591	Organic compounds	Aromatic heteropolycyclic compounds	Benzenoids	Benzene and substituted derivatives	NA	Phenyl methylcarbamates	NA
126900	0.000879189	0.00784914	0.571379	Organic compounds	Aromatic heteropolycyclic compounds	Organoheterocyclic compounds	Prenol lipids	NA	Phenylpiperazines	NA
104874	0.000703355	0.00676865	0.542487	Organic compounds	Aromatic heteropolycyclic compounds	Organoheterocyclic compounds	Organooxygen compounds	NA	Alkyl-phenylketones	NA
120963	0.0625041	0.205847	0.21008	no matches	no matches	no matches	no matches	no matches	no matches	NA
86872	0.120515	0.313339	-0.303766	Organic compounds	Aliphatic heteropolycyclic compounds	Lipids and lipid-like molecules	Prenol lipids	Terpene lactones	Eudesmanolides, secoeudesmanolides, and derivatives	NA
101212	0.116848	0.311456	-0.212443	no matches	no matches	no matches	no matches	no matches	no matches	NA
124961	0.0184841	0.086592	0.85549	Organic compounds	Aromatic heteropolycyclic compounds	Lipids and lipid-like molecules	Prenol lipids	Sesquiterpenoids	Triterpenoids	NA
117821	0.510803	0.711775	0.279984	Organic compounds	Aromatic heteropolycyclic compounds	Lipids and lipid-like molecules	Prenol lipids	Amino acids, peptides, and analogues	Delta amino acids and derivatives	NA
80589	0.0356331	0.137522	0.347151	no matches	no matches	no matches	no matches	no matches	no matches	NA
106893	0.579415	0.758692	0.132901	Organic compounds	Aromatic heteropolycyclic compounds	Lipids and lipid-like molecules	Steroids and steroid derivatives	NA	Steroid esters	NA
94436	0.238263	0.472066	-0.394532	no matches	no matches	no matches	no matches	no matches	no matches	NA
70079	0.219711	0.448867	-0.117016	Organic compounds	Aliphatic acyclic compounds	Lipids and lipid-like molecules	Prenol lipids	NA	Triterpenoids	Spectral Match to N-Lauroylsarcosine from NIST14
97477	0.730113	0.850651	-0.133987	no matches	no matches	no matches	no matches	no matches	no matches	NA
119313	0.154799	0.357623	0.253927	Organic compounds	Aromatic heteromonocyclic compounds	Lipids and lipid-like molecules	Carboxylic acids and derivatives	Amino acids, peptides, and analogues	Delta amino acids and derivatives	NA
131395	1.3e-24	2.41e-22	-4.93191	Organic compounds	Aromatic heteropolycyclic compounds	Lipids and lipid-like molecules	Carboxylic acids and derivatives	NA	Naphthothiazoles	NA
99848	0.131646	0.32845	0.662527	no matches	no matches	no matches	no matches	no matches	no matches	NA
134515	0.109173	0.29962	0.273595	Organic compounds	Aromatic heteropolycyclic compounds	Lipids and lipid-like molecules	Prenol lipids	NA	Acyl carnitines	NA
122065	0.0384917	0.146268	-0.331474	Organic compounds	Aliphatic homopolycyclic compounds	Lipids and lipid-like molecules	Prenol lipids	Triterpenoids	Triterpenoids	NA
127124	0.425854	0.63878	-0.204226	Organic compounds	Aliphatic heteropolycyclic compounds	Lipids and lipid-like molecules	Steroids and steroid derivatives	Bile acids, alcohols and derivatives	Triterpenoids	NA
128496	0.620789	0.773019	0.30061	Organic compounds	Aromatic heteropolycyclic compounds	Lipids and lipid-like molecules	Prenol lipids	NA	Acyl carnitines	NA
112207	1.3e-09	3.55e-08	-1.49532	Organic compounds	Aliphatic heteropolycyclic compounds	Lipids and lipid-like molecules	Steroids and steroid derivatives	Cholestane steroids	Cholesterols and derivatives	NA
124087	4.63e-05	0.000714281	1.372	Organic compounds	Aliphatic heteropolycyclic compounds	Lipids and lipid-like molecules	Steroids and steroid derivatives	Steroidal alkaloids	Acyl carnitines	NA
150346	0.895182	0.946262	-0.0433529	Organic compounds	Aromatic heteropolycyclic compounds	Lipids and lipid-like molecules	Prenol lipids	NA	Triterpenoids	NA
89133	0.989875	0.993891	0.0372352	Organic compounds	Aliphatic acyclic compounds	Lipids and lipid-like molecules	Prenol lipids	Diterpenoids	Aconitane-type diterpenoid alkaloids	NA
144212	0.436672	0.648445	-0.169622	Organic compounds	Aromatic heteropolycyclic compounds	Lipids and lipid-like molecules	Prenol lipids	NA	5,10-cycloaromadendrane sesquiterpenoids	NA
65344	0.872354	0.933887	0.0276727	Organic compounds	Aromatic heteropolycyclic compounds	Organoheterocyclic compounds	Benzene and substituted derivatives	NA	Benzimidazoles	NA
121715	0.103051	0.290346	0.442917	Organic compounds	Aliphatic homopolycyclic compounds	Lipids and lipid-like molecules	Steroids and steroid derivatives	Bile acids, alcohols and derivatives	Bile acids, alcohols and derivatives	NA
55403	0.243003	0.478897	0.198055	Organic compounds	Aromatic homopolycyclic compounds	Lipids and lipid-like molecules	Prenol lipids	NA	Sesquiterpenoids	NA
101293	0.369678	0.600727	0.189347	Organic compounds	Aliphatic acyclic compounds	Lipids and lipid-like molecules	Fatty Acyls	Fatty acid esters	Acyl carnitines	NA
93691	0.955639	0.982132	-0.0115942	Organic compounds	Aromatic heteropolycyclic compounds	Lipids and lipid-like molecules	Prenol lipids	NA	Macrolactams	NA
79310	0.617414	0.770863	0.133865	Organic compounds	Aromatic heteropolycyclic compounds	Organoheterocyclic compounds	Carboxylic acids and derivatives	NA	Thioureas	NA
125300	1.6e-11	5.4e-10	-1.25808	Organic compounds	Aromatic heteropolycyclic compounds	Organic acids and derivatives	Carboxylic acids and derivatives	Amino acids, peptides, and analogues	Dipeptides	NA
81136	0.306432	0.549399	0.0731518	no matches	no matches	no matches	no matches	no matches	no matches	NA
14230	0.448434	0.656698	0.279683	Organic compounds	Aliphatic acyclic compounds	Lipids and lipid-like molecules	Fatty Acyls	Fatty acids and conjugates	Medium-chain fatty acids	NA
140283	0.314257	0.551812	-0.243401	Organic compounds	Aromatic heteropolycyclic compounds	Lipids and lipid-like molecules	Steroids and steroid derivatives	NA	Triterpenoids	NA
117375	0.233027	0.466684	-1.06099	Organic compounds	Aromatic heteromonocyclic compounds	Lipids and lipid-like molecules	Prenol lipids	Amino acids, peptides, and analogues	Delta amino acids and derivatives	NA
61209	0.726636	0.849897	-0.0800597	no matches	no matches	no matches	no matches	no matches	no matches	NA
116269	0.0307312	0.12512	0.324789	no matches	no matches	no matches	no matches	no matches	no matches	NA
93666	0.11918	0.312347	0.76832	Organic compounds	Aliphatic acyclic compounds	Lipids and lipid-like molecules	Fatty Acyls	NA	Acyl carnitines	NA
119311	0.00731492	0.0440679	-0.561061	Organic compounds	Aromatic heteromonocyclic compounds	Lipids and lipid-like molecules	Carboxylic acids and derivatives	Amino acids, peptides, and analogues	Delta amino acids and derivatives	NA
70680	0.360422	0.595165	-0.369424	Organic compounds	Aromatic heteropolycyclic compounds	Organoheterocyclic compounds	Organooxygen compounds	NA	Sesquiterpenoids	NA
